# Supplementary material
Source: PubMed Central journal article supplement (PMC6072342)

**Supplementary data**  
**(For online publication)**

**Discovery of 2-aminoimidazole and 2-aminoimidazolyl-thiazoles as non-xanthine human adenosine  
A<sub>3</sub> receptor antagonists: Structure-Activity Relationships and Molecular Modeling studies**

Amit N. Pandya<sup>a</sup>, Arshi B. Baraiya<sup>a</sup>, Hitesh B. Jalani<sup>a</sup>, Dhairvat Pandya<sup>a</sup>, Jitendra C. Kaila<sup>a</sup>, Sonja Kachler<sup>b</sup>, Veronica Salmaso<sup>c</sup>, Stefano Moro<sup>c</sup>, Karl-Norbert Klotz<sup>b</sup>, Kamala K. Vasu<sup>a\*</sup>

<sup>a</sup>Department of Medicinal Chemistry, B.V. Patel Pharmaceutical Education and Research Development (PERD) Centre, Thaltej-Gandhinagar Highway, Thaltej, Ahmedabad 380 054, Gujarat, India.

<sup>b</sup>Institut für Pharmakologie und Toxikologie, Julius-Maximilians-Universität Würzburg, Germany.

<sup>c</sup>Molecular Modeling Section (MMS), Dipartimento di Scienze Farmaceutiche, Università degli Studi di Padova, via Marzolo 5, 35131 Padova, Italy

\*Corresponding author. Tel.: +91 79 27439375; fax: +91 79 27450449;

Communication Ref. No.: PERD750117

E-mail: [kamkva@gmail.com](mailto:kamkva@gmail.com), [perd@perdcentre.com](mailto:perd@perdcentre.com)

## Experimental section

**Table-S1:** Binding affinities of 2-aminoimidazole derivatives for human adenosine receptors

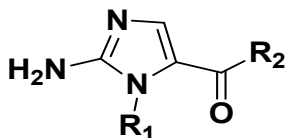

| Compound | R <sub>1</sub>                                  | R <sub>2</sub>                                    | 6a-6l Binding experiments<br>K <sub>i</sub> (μM) |                               |                              | Adenylyl<br>cyclase<br>activity<br>K <sub>i</sub><br>(μM) |
|----------|-------------------------------------------------|---------------------------------------------------|--------------------------------------------------|-------------------------------|------------------------------|-----------------------------------------------------------|
|          |                                                 |                                                   | hA <sub>1</sub> <sup>a</sup>                     | hA <sub>2A</sub> <sup>b</sup> | hA <sub>3</sub> <sup>c</sup> | hA <sub>2B</sub> <sup>d</sup>                             |
| 6a       | 4-FC <sub>6</sub> H <sub>4</sub>                | 4-MeC <sub>6</sub> H <sub>4</sub>                 | > 100                                            | > 100                         | > 100                        | > 30                                                      |
| 6b       | 4-FC <sub>6</sub> H <sub>4</sub>                | 4-OMeC <sub>6</sub> H <sub>4</sub>                | > 100                                            | > 100                         | > 100                        | > 30                                                      |
| 6c       | 4-FC <sub>6</sub> H <sub>4</sub>                | 4-ClC <sub>6</sub> H <sub>4</sub>                 | > 100                                            | > 100                         | > 100                        | > 30                                                      |
| 6d       | 4-ClC <sub>6</sub> H <sub>4</sub>               | 4-MeC <sub>6</sub> H <sub>4</sub>                 | > 100                                            | > 100                         | > 100                        | > 30                                                      |
| 6e       | 4-ClC <sub>6</sub> H <sub>4</sub>               | 4-C <sub>5</sub> H <sub>4</sub> N                 | > 100                                            | > 100                         | 32.6<br>(25.8 – 41.1)        | > 30                                                      |
| 6f       | C <sub>6</sub> H <sub>5</sub>                   | 4-SO <sub>2</sub> MeC <sub>6</sub> H <sub>4</sub> | > 100                                            | > 100                         | > 100                        | > 30                                                      |
| 6g       | 4-CF <sub>3</sub> C <sub>6</sub> H <sub>4</sub> | 4-ClC <sub>6</sub> H <sub>4</sub>                 | > 100                                            | 39.0<br>(27.5 – 55.4)         | 15.2<br>(12.5 – 18.4)        | > 30                                                      |
| 6h       | 2-ClC <sub>6</sub> H <sub>4</sub>               | 4-MeC <sub>6</sub> H <sub>4</sub>                 | > 100                                            | > 100                         | 22.7<br>(21.6– 23.7)         | > 30                                                      |
| 6i       | 3-ClC <sub>6</sub> H <sub>4</sub>               | 4-MeC <sub>6</sub> H <sub>4</sub>                 | > 100                                            | > 100                         | 34.8<br>(31.7- 38,1)         | > 30                                                      |
| 6j       | 3-Cl 4-FC <sub>6</sub> H <sub>4</sub>           | 4-ClC <sub>6</sub> H <sub>4</sub>                 | > 100                                            | > 100                         | 27.8<br>(22.1 – 34.9)        | > 30                                                      |
| 6k       | 4-CF <sub>3</sub> C <sub>6</sub> H <sub>4</sub> | 4-C <sub>5</sub> H <sub>4</sub> N                 | > 100                                            | > 100                         | > 100                        | > 30                                                      |
| 6l       | 4-FC <sub>6</sub> H <sub>4</sub>                | 4-C <sub>5</sub> H <sub>4</sub> N                 | > 100                                            | > 100                         | > 100                        | > 30                                                      |

<sup>a</sup> Displacement of specific [<sup>3</sup>H]CCPA binding at human A<sub>1</sub> receptors expressed in CHO cells.

<sup>b</sup> Displacement of specific [<sup>3</sup>H]NECA binding at human A<sub>2A</sub> receptors expressed in CHO cells.

<sup>c</sup> Displacement of specific [<sup>3</sup>H]HEMADO binding at human A<sub>3</sub> receptors expressed in CHO cells.

<sup>d</sup> Inhibition of NECA-stimulated adenylyl cyclase activity at human A<sub>2B</sub> receptors expressed in CHO cells.

Data are expressed as geometric means, with 95% confidence limits in parentheses.

## Biology

Receptor-radioligand binding studies were performed as previously described by Klotz et al <sup>1</sup>. The membranes for radioligand binding were prepared from CHO cells stably transfected with human adenosine receptor subtypes in a two-step procedure. In a first low-speed step (1,000x g) cell fragments and nuclei were removed. The crude membrane fraction was sedimented from the supernatant at 100,000x g. The membrane pellet was re-suspended in the buffer used for the respective binding experiments, frozen in liquid nitrogen and stored at -80°C. For the measurement of adenylyl cyclase activity only one high-speed centrifugation of the homogenate was used. The resulting crude membrane pellet was re-suspended in 50mM Tris/HCl, pH 7.4 and immediately used for the cyclase assay.

For agonist radioligand binding at A<sub>1</sub> adenosine receptors 1 nM [<sup>3</sup>H]CCPA was used, whereas 10 nM [<sup>3</sup>H]NECA were used for A<sub>2A</sub> receptors. For A<sub>3</sub> adenosine receptors the newly developed high-affinity agonist [<sup>3</sup>H]HEMADO<sup>2</sup> at a concentration of 1 nM was used.

Non-specific binding of [<sup>3</sup>H]CCPA was determined in the presence of 1 mM theophylline, in the case of [<sup>3</sup>H]NECA and [<sup>3</sup>H]HEMADO 100 μM R-PIA was used. K<sub>i</sub>-values from competition experiments were calculated with the program SCTFIT. <sup>3</sup>

Radioligand binding at A<sub>2B</sub> adenosine receptors is problematic as no high-affinity ligand is available for this subtype. Therefore, inhibition of NECA-stimulated adenylyl cyclase activity was determined as a measurement of affinity of compounds. No detectable interaction of the compounds under investigation with the A<sub>2B</sub> AR was observed.

### References:

1. Klotz, K.-N. et al *Naunyn-Schmiedeberg's Arch. Pharmacol.* **1998**,357, 1.
2. Klotz, K.-N.; Falgner, N.; Kachler, S.; Lambertucci, C.; Vittori, S.; Volpini, R.; Cristalli, G. *Eur. J. Pharmacol.* **2007**, 556,14.
3. De Lean, A. et al. *Mol. Pharmacol.* **1982**, 21, 5.

### Molecular modeling studies

### ***Software overview***

General molecular modeling operations, such as drawing of ligand structures, partial charges computation, energetic analysis and visual inspection of docking poses, were performed using the MOE suite (Molecular Operating Environment, version 2015.1001) [1]. Shape similarity studies were conducted with the vROCS application of the OpenEye Scientific Software [7]. GOLD (Genetic Optimization for Ligand Docking, version 5.2) suite [2] was used for docking simulations. Calculation of ligand partial charges was performed with the software MOPAC [3] as implemented in the MOE suite. CHIMERA [4] was used for image production and GNUPLOT 4.6 [5] to construct plots. Video assembly was carried out using MEncoder [6]. Molecular modeling studies have been performed on a 8 CPU (Intel® Xeon® CPU E5-1620 3.70 GHz) linux workstation.

### ***Three-dimensional structures of Adenosine Receptors***

A shape similarity comparison was conducted among compound **12b**, chosen as representative of the series under examination, and all the ligands retrieved from A<sub>2A</sub> AR PDB structures available to date. Consequently, 3UZC [8] crystallographic structure was chosen because its co-crystallized ligand, 4-(3-amino-5-phenyl-1,2,4-triazin-6-yl)-2-chlorophenol, showed highest ROCS Tanimoto Combo value for compound **12b**. Homology models of A<sub>3</sub> and A<sub>1</sub> ARs, constructed using 3UZC structure as a template, were retrieved from the *Adenosiland* web-platform [9,10]. The protein residues have been named according the generic Ballesteros Weinstein numbering system [11] throughout this work.

### ***Molecular docking***

MOE-Builder tool was employed to model three-dimensional structures of ligands and the MOE-Protonate-3D [12] tool was used to predict ionization states of ligands and proteins. Newly added protein hydrogens were minimized using Amber12EHT force field, while ligand structures were subjected to MMFF94x energy minimization, fixing the root mean square (rms) gradient cutoff at 0.1 kcal mol<sup>-1</sup> Å<sup>-2</sup>. Taking advantage of a docking benchmark previously performed in our laboratory [13,14], GOLD docking tool [2] was selected as conformational search program and GoldScore as scoring function. For each compound, 20 docking runs were performed on each

receptor subtype, searching in a sphere of 20 Å radius centered on Asn6.55 residue. After computing Amber12EHT partial charges for receptor atoms and PM3/ESP atomic partial charges for ligands poses, electrostatic and van der Waals interactions were calculated with MOE.

### ***Interaction Energy Fingerprints (IEFs)***

Protein residues within 4.5 Å of the selected pose of compound **12b** were identified as defining the binding pocket of the receptor. Per residue electrostatic and hydrophobic interactions (named IEele and IEhyd, respectively) were calculated between each binding site residue and the ligand, using MOE [13,15]. In particular, IEele, measured in kcal/mol, were computed with Amber12EHT force field. Instead, IEhyd, expressed by an adimensional score (the higher the better), were computed as contact hydrophobic surfaces. The data were plotted on a heat map, called Interaction Energy Fingerprints (IEFs), in which residues are reported on the x-axis and the energetic values are rendered by a colorimetric scale. As regards IEele, colors from blue to red depict energy values ranging from negative to positive ones; for IEhyd, colors from white to dark green represent scores going from 0 to positive values.

### ***MMsDocking video maker***

A in-house tool, named MMsDocking video maker, was used to produce videos with the aim to facilitate the visualization and analysis of data obtained from the docking simulations. The videos show for each ligand the selected docking pose, scoring values, experimental binding data and per residue IEhyd and IEele of most relevant residues. IEhyd and IEele were computed as previously described and plotted with GNUPLOT [5], molecular representation of docked compounds were obtained using CHIMERA [4] software, 2D depictions of the compounds were drawn with RDKit toolkit [16]. Images were assembled into videos using MEncoder[6].

## **SUPPLEMENTARY MATERIAL**

Videos SM1-SM2-SM3: Videos reporting the selected docking poses on A<sub>3</sub>, A<sub>2A</sub> and A<sub>1</sub> adenosine receptors binding sites, respectively. Ligands are rendered by light-blue sticks, and protein residues by tan sticks. Protein residues mainly involved in binding are shown. For A<sub>2A</sub> and A<sub>1</sub> receptors, in addition to highly interacting residues, residues at equivalent positions to those selected for A<sub>3</sub> receptor are reported, to enable inter-receptors comparison. The heat maps depicted in the

background report the electrostatic and hydrophobic contributions of the selected residues (“ele” and “hyd” labels identify the major contribution type of the residue) by a colorimetric scale going from blue to green for negative to positive values. Hydrogen bonds are represented by yellow lines.

## REFERENCES

1. Chemical Computing Group Inc. Molecular Operating Environment (MOE) [Internet]. Available from: <http://www.chemcomp.com>
2. Cambridge Crystallographic Data Centre: 12 Union Road, Cambridge CB2 1EZ, UK. GOLD suite, version 5.2 [Internet]; Available from: <http://www.ccdc.cam.ac.uk>
3. Stewart JJ. Optimization of parameters for semiempirical methods V: modification of NDDO approximations and application to 70 elements. *J Mol Model* 2007;13:1173–1213
4. Pettersen EF, Goddard TD, Huang CC, Couch GS, Greenblatt DM, Meng EC, et al. UCSF Chimera: a visualization system for exploratory research and analysis. *J Comput Chem* 2004;25:1605–12.
5. Gnuplot [Internet]. Available from: <http://www.gnuplot.info/index.html>
6. MEncoder [Internet]. Available from: <http://www.mplayerhq.hu/design7/projects.html>
7. Hawkins PCD, Skillman AG, Nicholls A. Comparison of Shape-Matching and Docking as Virtual Screening Tools. *J Med Chem*. 2007 Jan 1;50(1):74–82.
8. Congreve M, Andrews SP, Doré AS, Hollenstein K, Hurrell E, Langmead CJ, et al. Discovery of 1,2,4-triazine derivatives as adenosine A(2A) antagonists using structure based drug design. *J Med Chem*. 2012 Mar 8;55(5):1898–903.
9. Floris M, Sabbadin D, Medda R, Bulfone A, Moro S. Adenosiland: Walking through adenosine receptors landscape. *Eu J Med Chem* 2012;58:248–57.
10. Floris M, Sabbadin D, Ciancetta A, Medda R, Cuzzolin A, Moro S. Implementing the “Best Template Searching” tool into Adenosiland platform. *In Silico Pharmacol* 2013;20:1-25.
11. Ballesteros JA, Weinstein H. Integrated methods for the construction of three-dimensional models and computational probing of structure-function relations in G protein-coupled receptors, *Methods in Neurosciences* 1995; 25:366–428.
12. Labute P. Protonate3D: assignment of ionization states and hydrogen coordinates to macromolecular structures. *Proteins*. 2009;75:187–205.

13. Ciancetta A, Cuzzolin A, Moro S. "Alternative Quality Assessment Strategy to Compare Performances of GPCR-Ligand Docking Protocols: The Human Adenosine A2A Receptor as a Case Study." *J Chem Inf Model* 2014;54:2243-2254.
14. Cuzzolin A, Sturlese M, Malvacio I, Ciancetta A, Moro S. DockBench: An Integrated Informatic Platform Bridging the Gap between the Robust Validation of Docking Protocols and Virtual Screening Simulations. *Molecules* 2015;20:9977–9993.
15. Ciancetta A, Sabbadin D, Federico S, Spalluto G, Moro S. "Advances in Computational Techniques to Study GPCR-Ligand Recognition." *Trends Pharmacol Sci.* 2015;36:878-890.
16. RDKit: Cheminformatics and Machine Learning Software [Internet]. Available from: <http://www.rdkit.org>

**Spectral data (LC-MS (M+1)<sup>+</sup>, <sup>1</sup>H NMR and <sup>13</sup>C NMR) of compounds (6a-6l) and (12a-12l)**

+Q1: 0.502 to 0.636 min from Sample 4 (10A) of 070309.wiff (Ion Spray), subtracted (0.234 to 0.385 min)

Max. 2.8e6 cps.

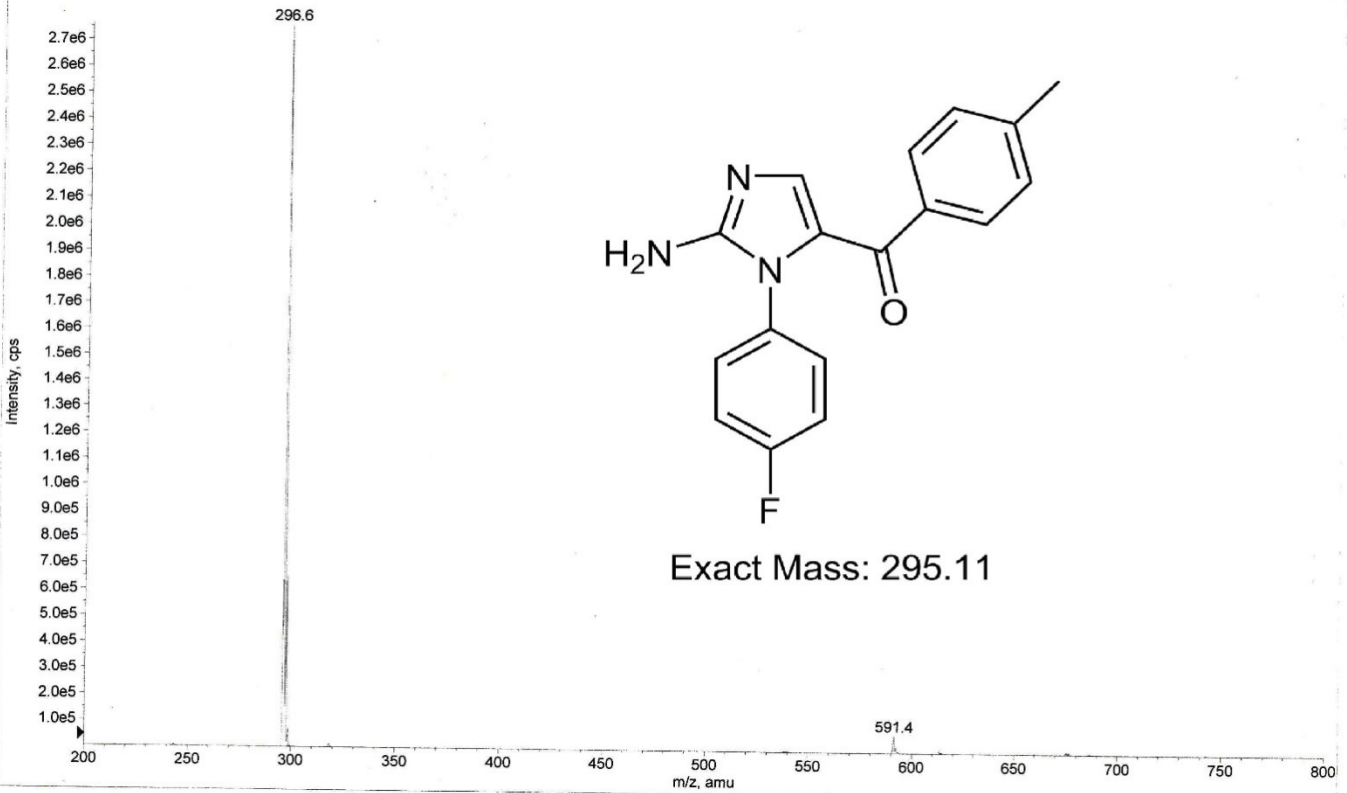



13 12 11 10 9 8 7 6 5 4 3 2 1 0 -1 ppm

2.000  
3.029  
4.100

2.013

2.999  
0.319

**<sup>13</sup>C-NMR / CDCl<sub>3</sub>**

182.050

164.006

160.703

153.792

142.442

140.540

136.044

131.713

128.921

128.843

127.838

116.791

116.486

77.427

77.003

76.579

21.468

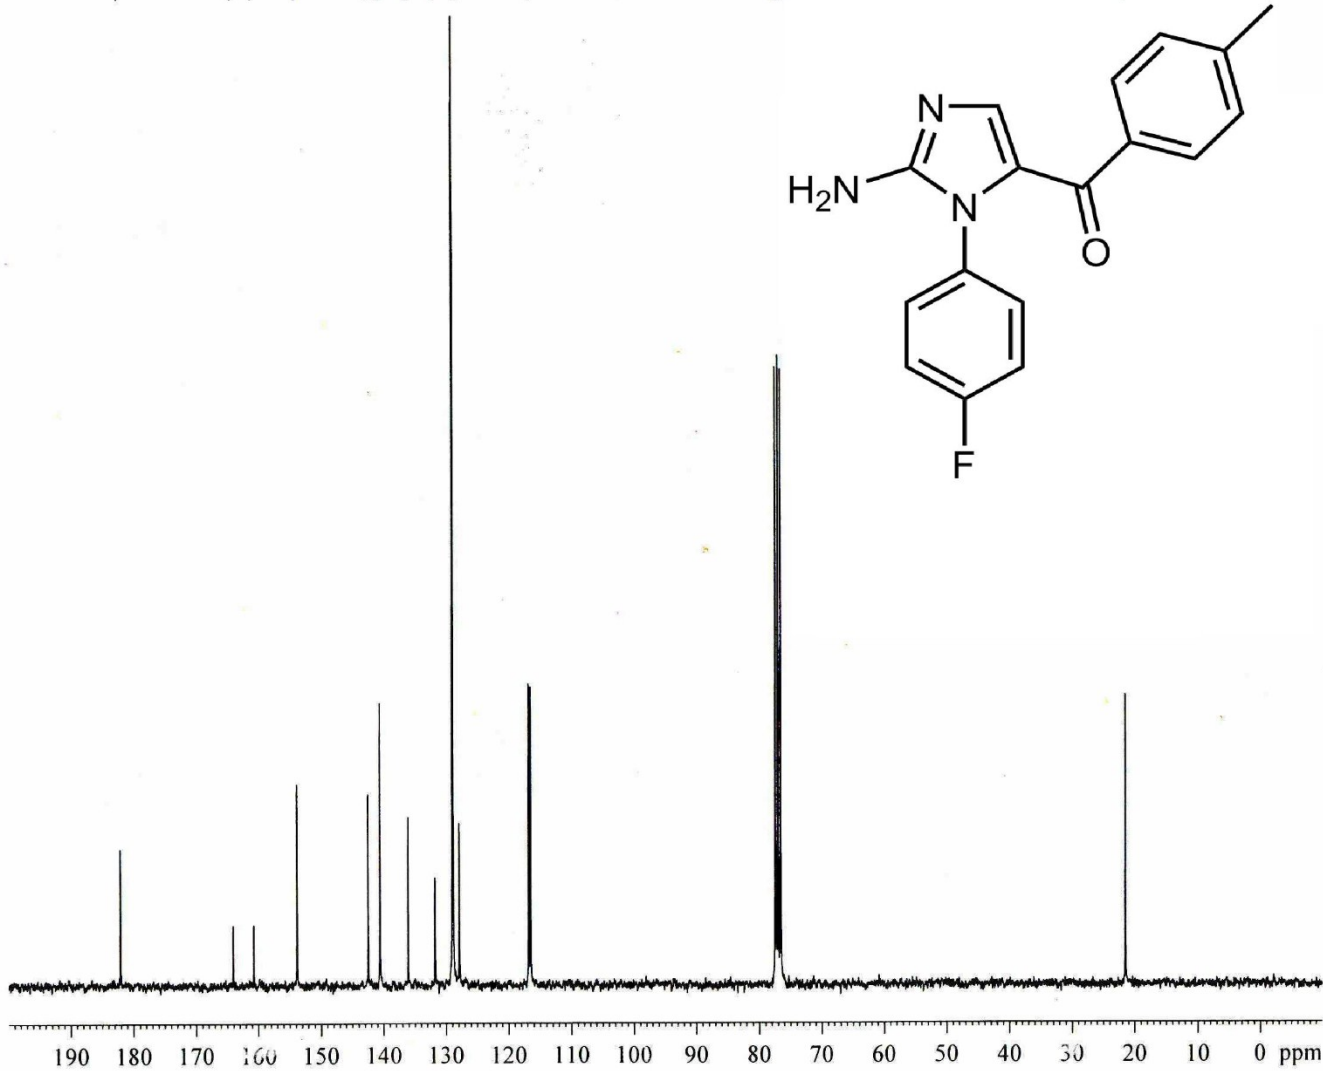

+Q1: 0.502 to 0.603 min from Sample 6 (10C) of 070309.wiff (Ion Spray), subtracted (0.251 to 0.452 min)

Max. 2.5e5 cps

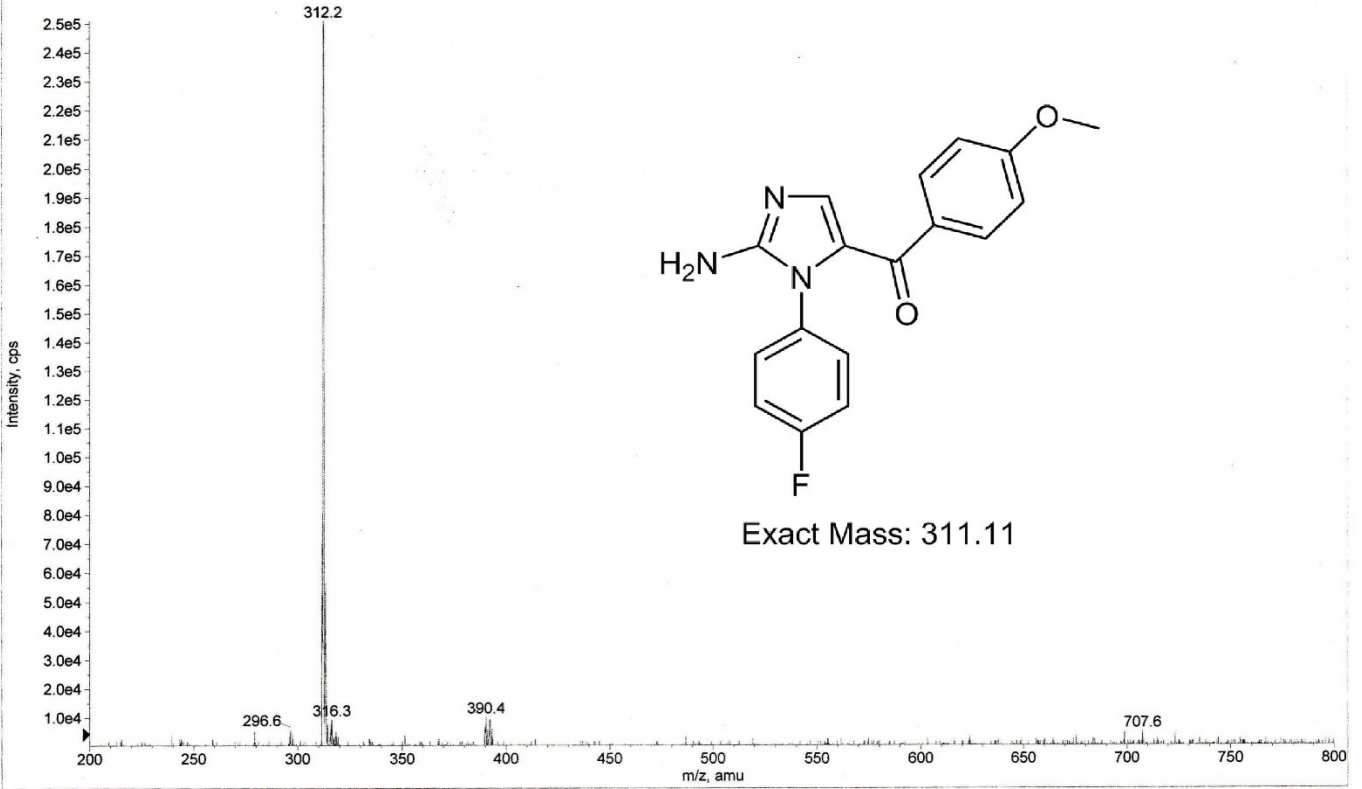

1H-NMR / CDCl3

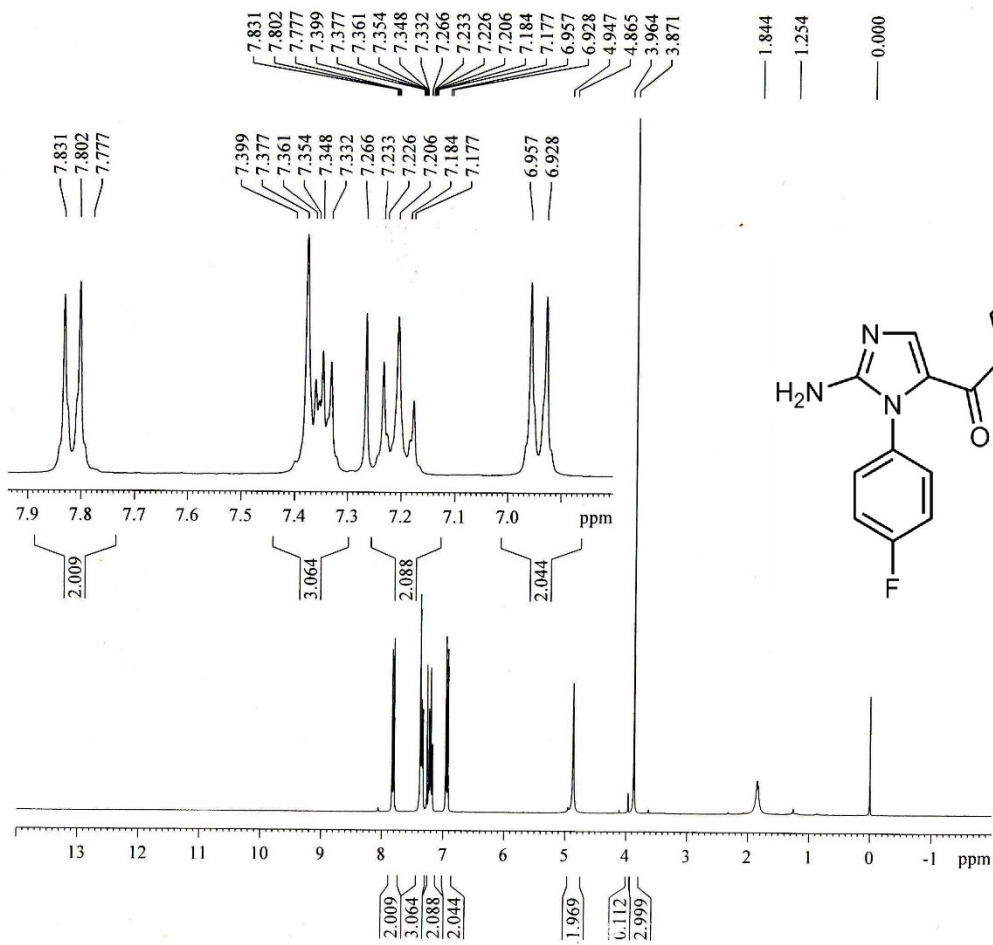

**<sup>13</sup>C-NMR / CDCl<sub>3</sub>**

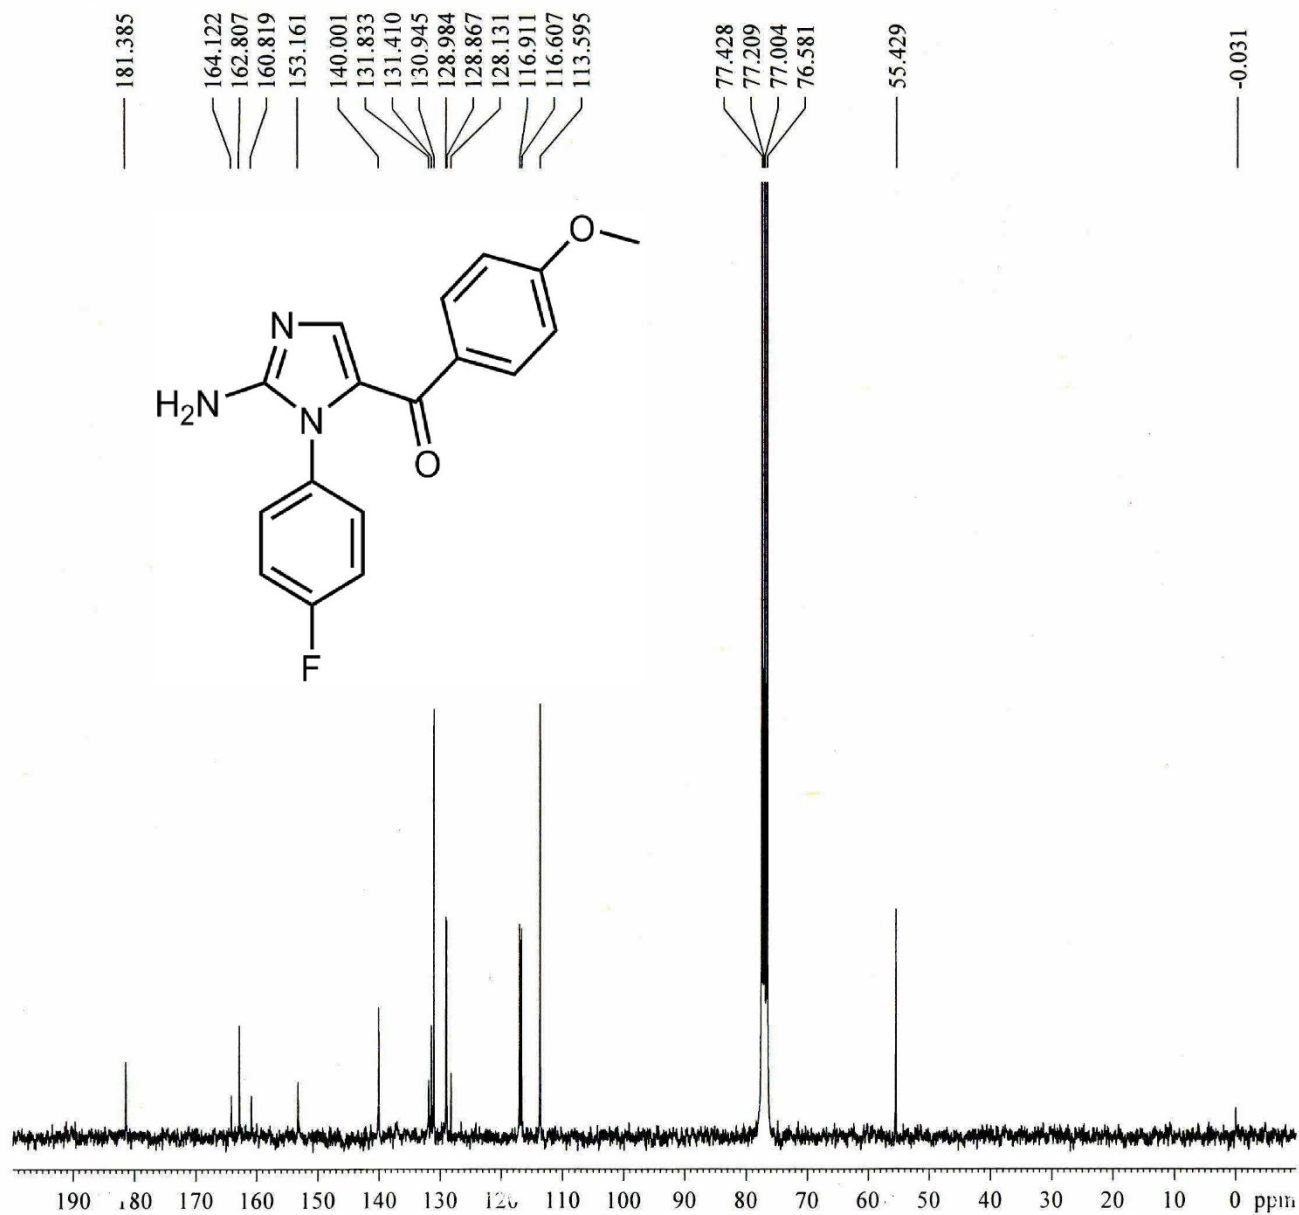

Exact Mass: 315.06

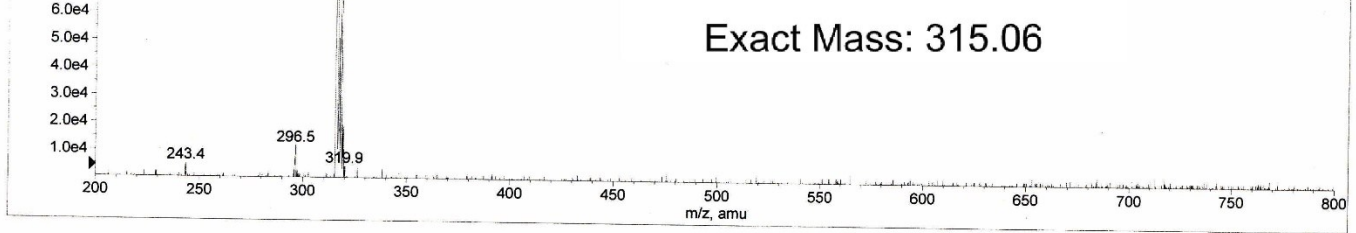

1H-NMR / CDCl3

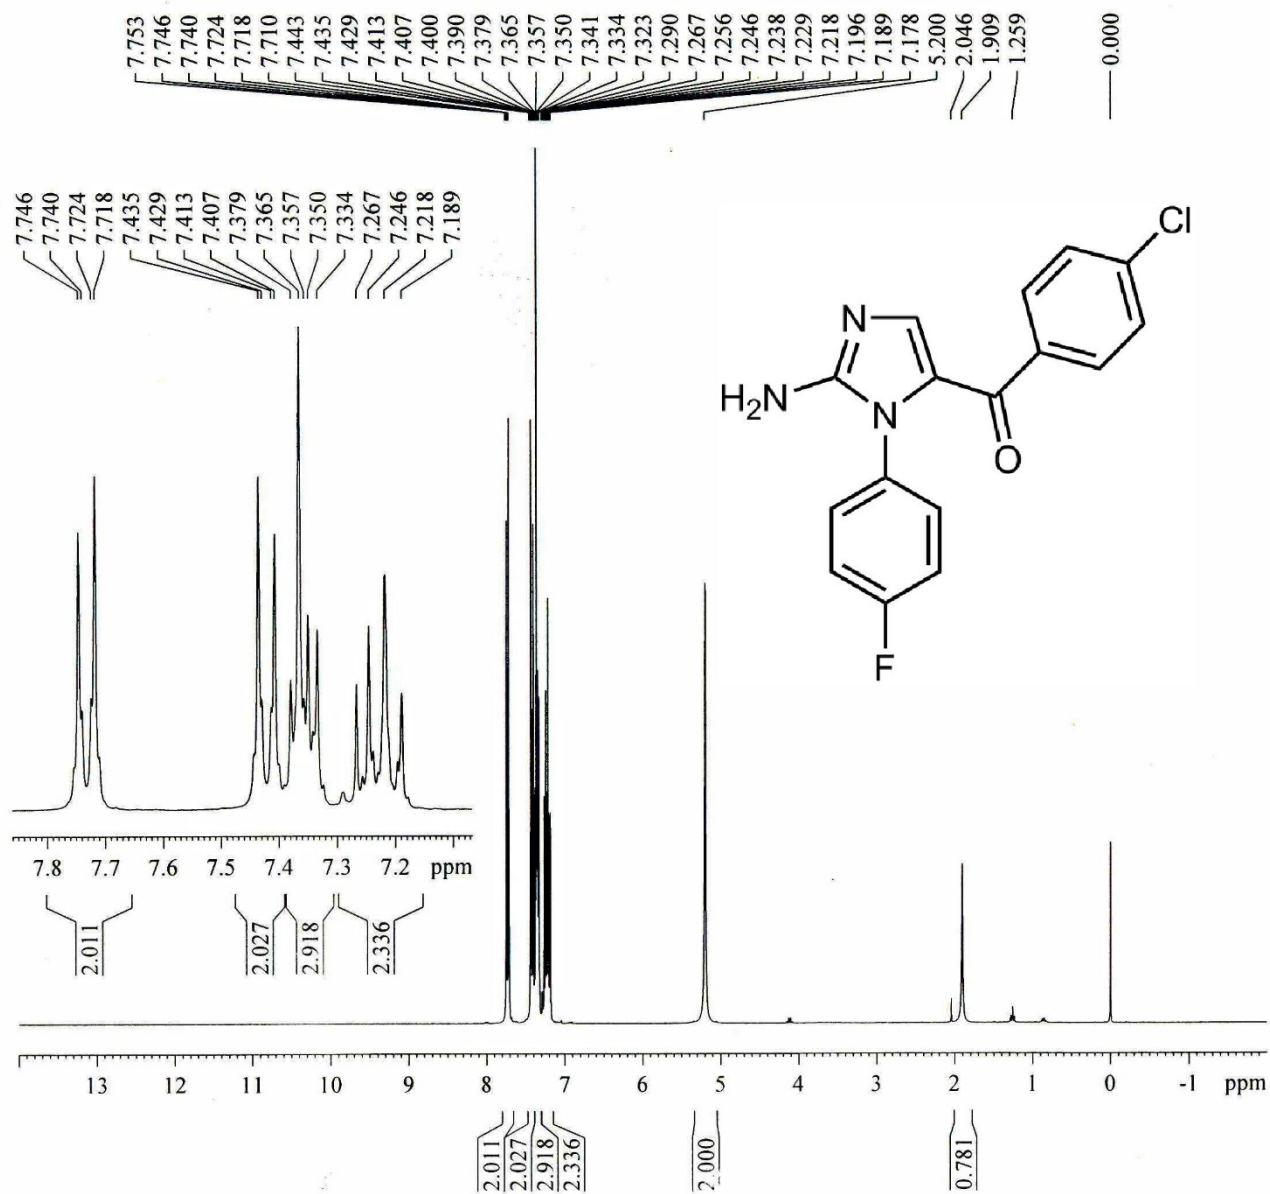

13C-NMR / CDCl3

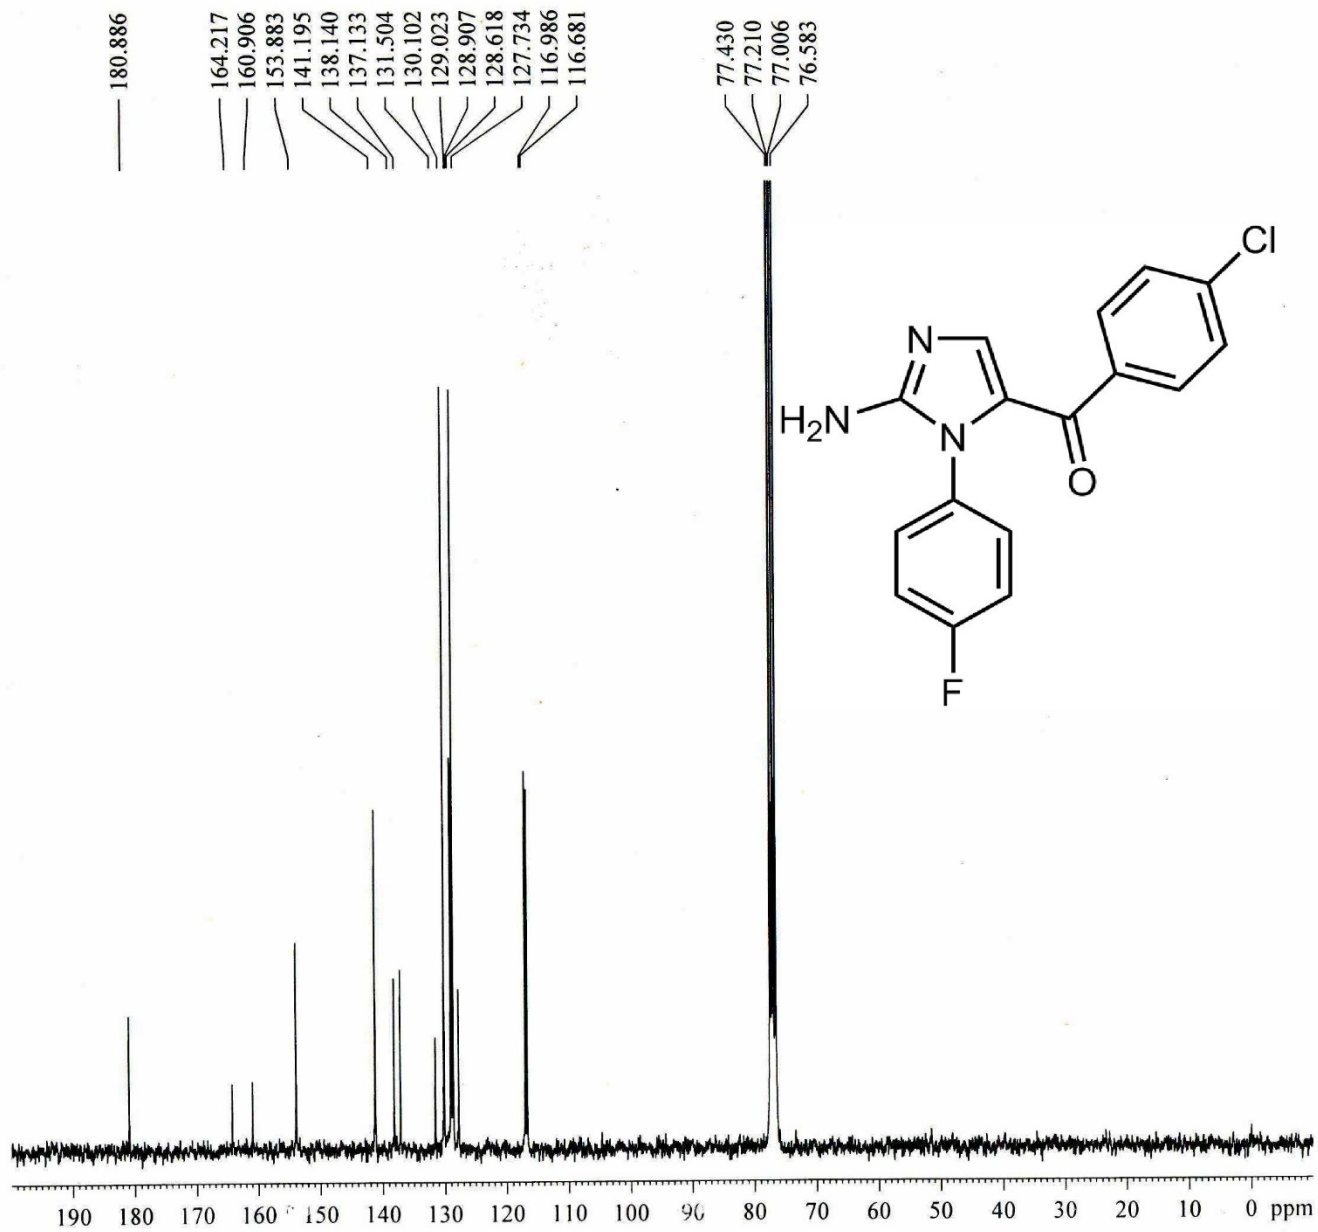

+Q1: 0.485 to 0.586 min from Sample 7 (10D) of 070309.wiff (Ion Spray), subtracted (0.250 to 0.418 min)

Max. 1.1e6 cps

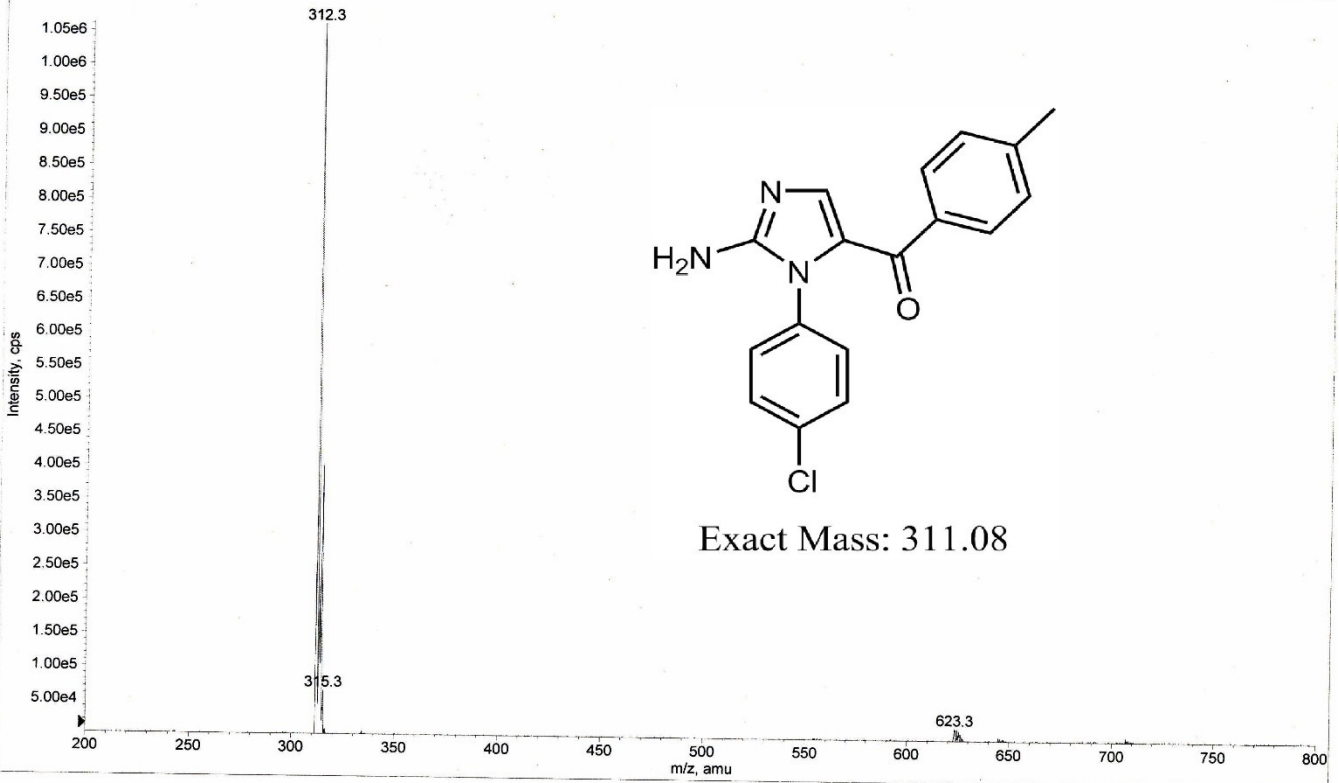



**<sup>1</sup>H-NMR / CDCl<sub>3</sub>**

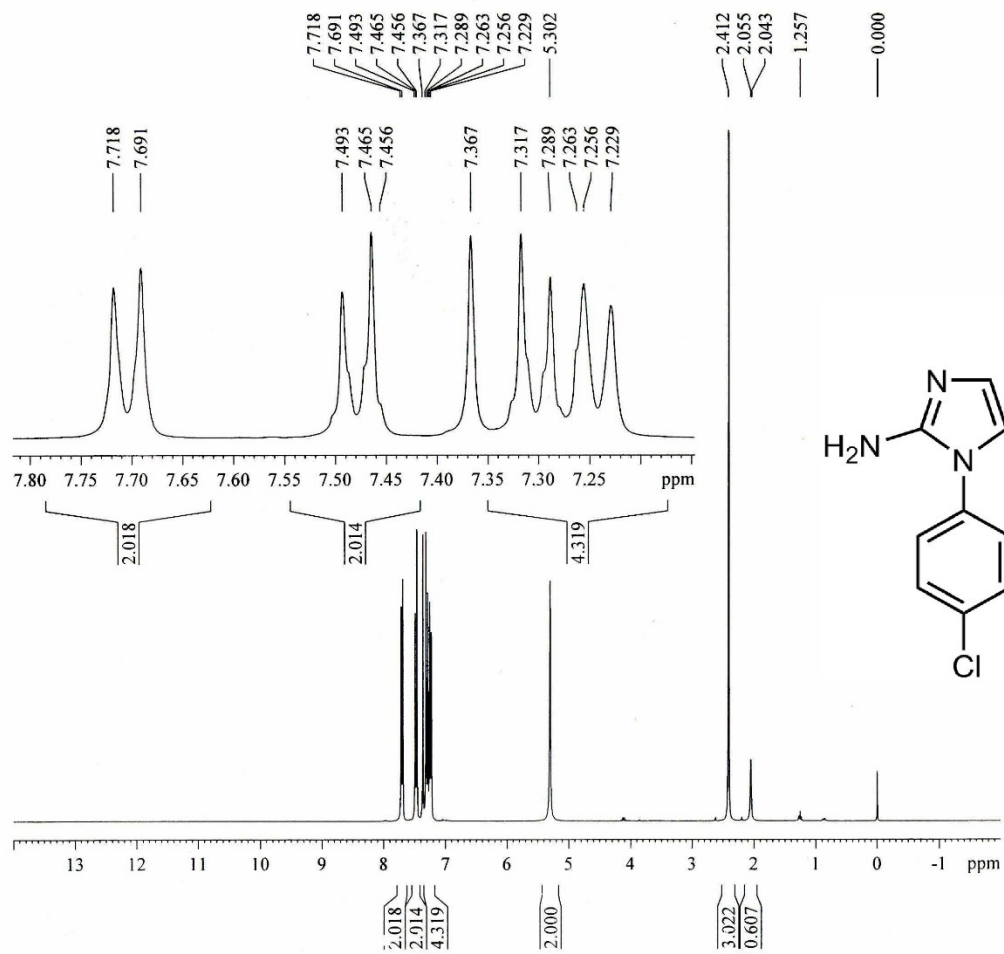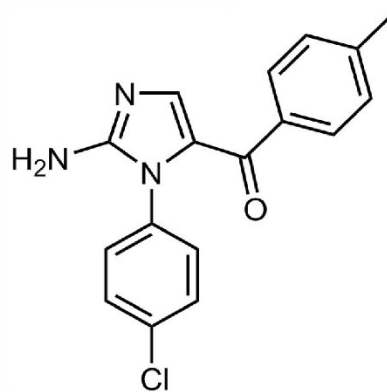

13C-NMR / CDCl3

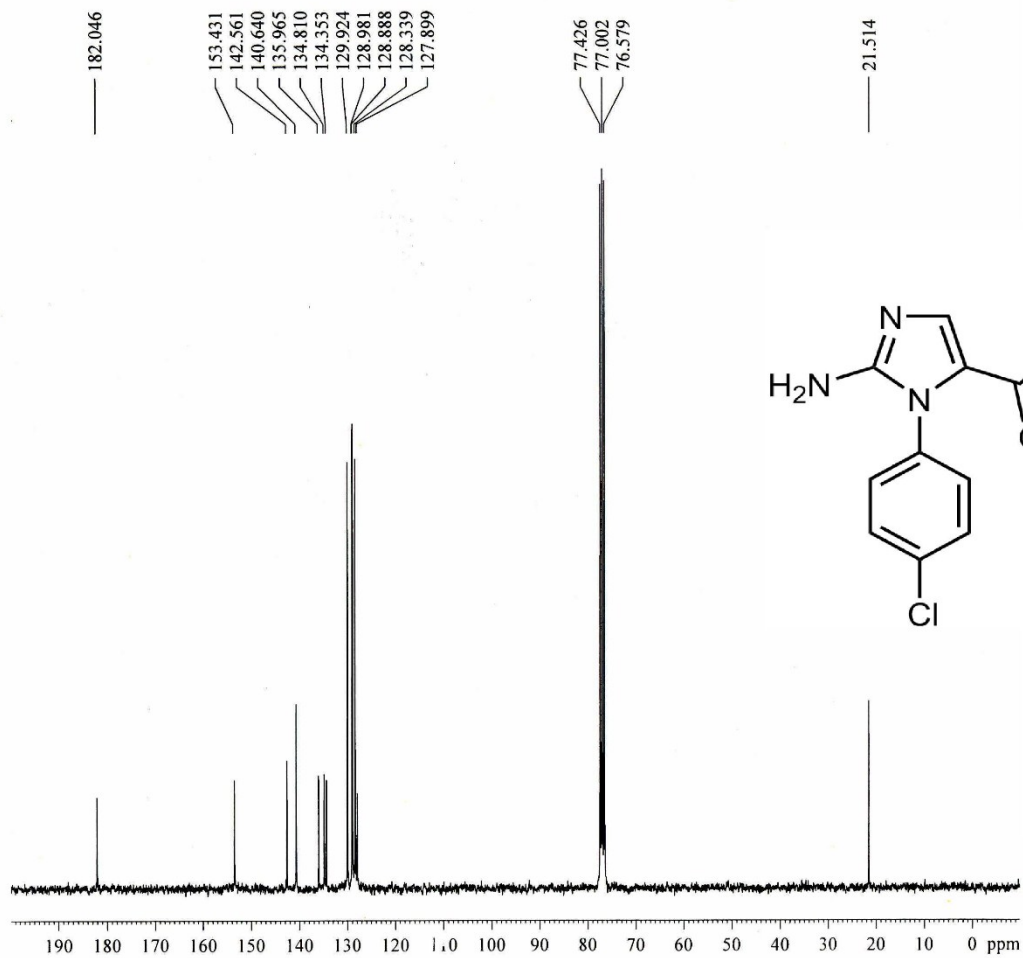

+Q1: 0.502 to 0.603 min from Sample 8 (10E) of 070309.wiff (Ion Spray), subtracted (0.268 to 0.452 min)

Max. 8.6e4 cps

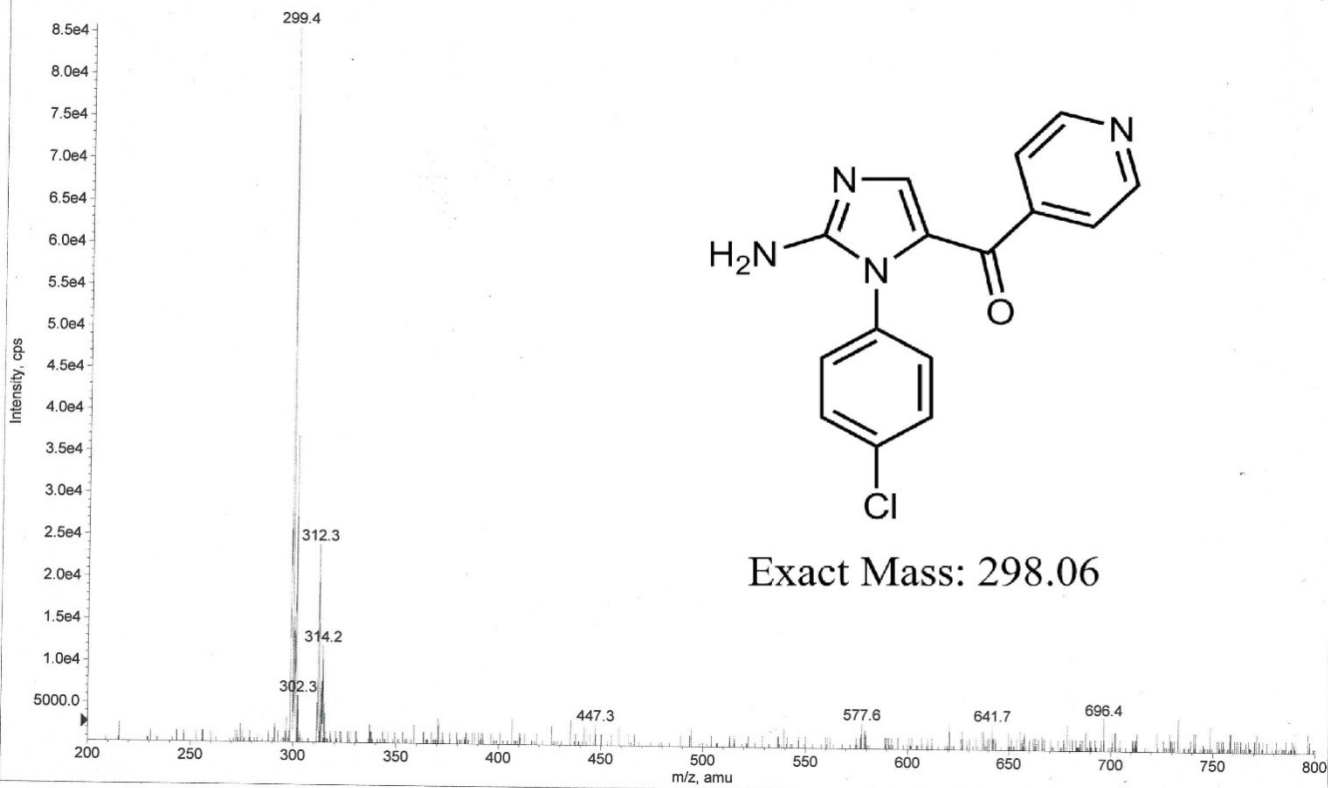

Exact Mass: 298.06

1H-NMR / CDCl3

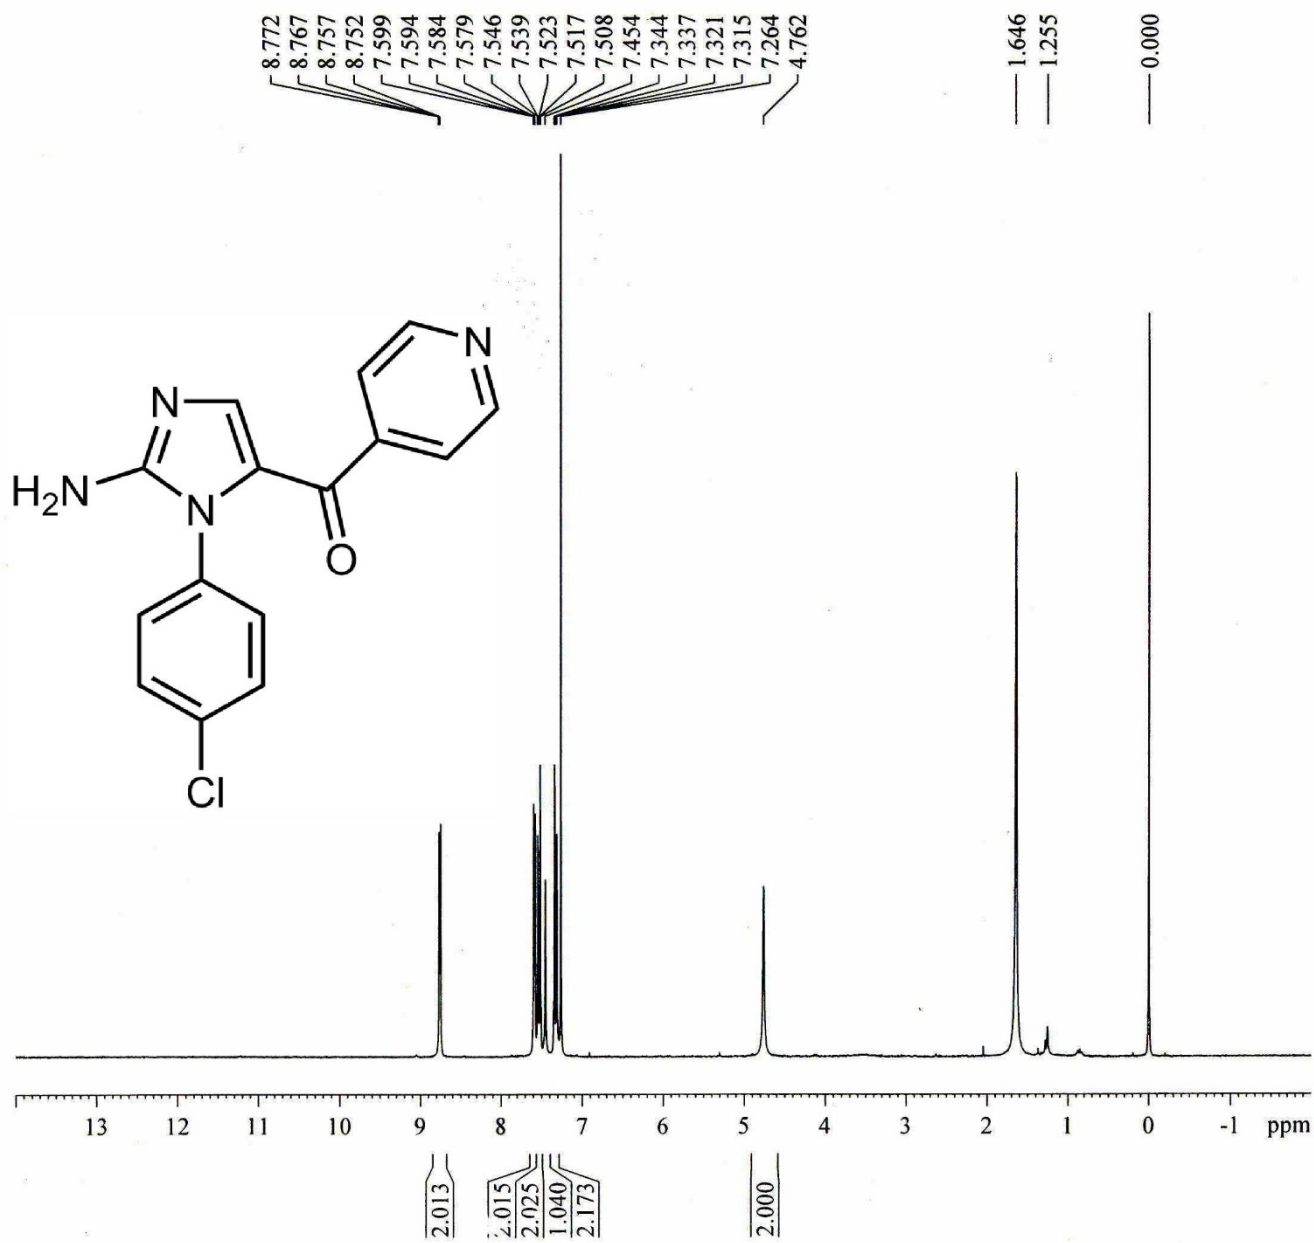

13C-NMR / CDCl3

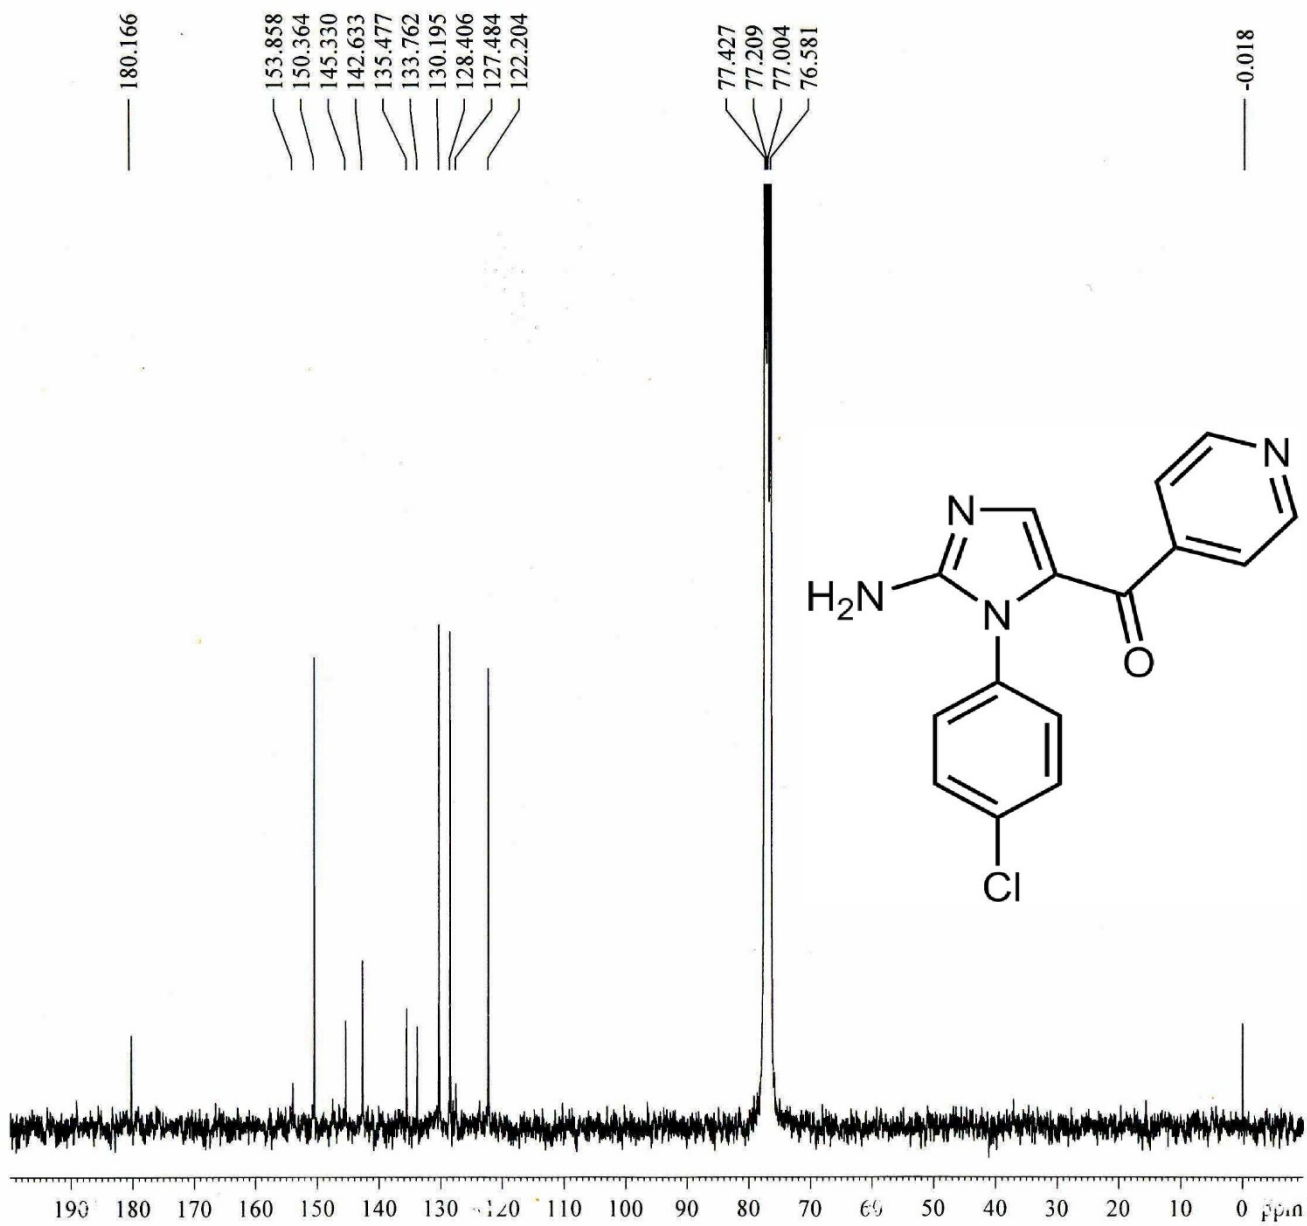

+Q1: 0.452 to 0.603 min from Sample 9 (10F) of 070309.wiff (Ion Spray), subtracted (0.201 to 0.418 min)

Max. 7.4e4 cps

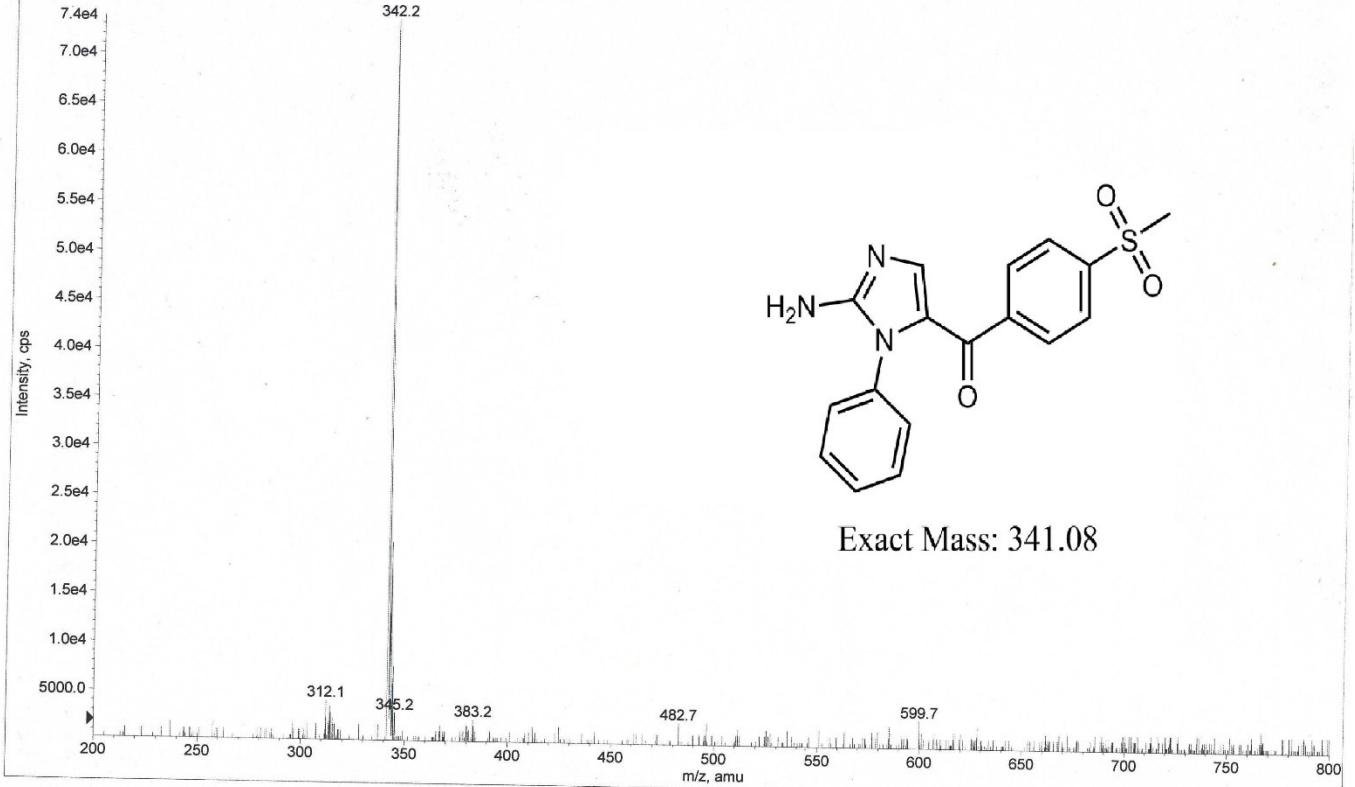

1H-NMR / DMSO-d6

8.280  
8.000  
7.972  
7.886  
7.859  
7.494  
7.488  
7.482  
7.466  
7.459  
7.441  
7.429  
7.424  
7.415  
7.406  
7.393  
7.386  
7.382  
7.366  
7.324  
7.300  
7.265  
7.240  
7.220  
7.216  
7.180  
7.174  
7.152  
6.451  
5.721  
3.353  
3.317  
3.238  
3.163  
2.464

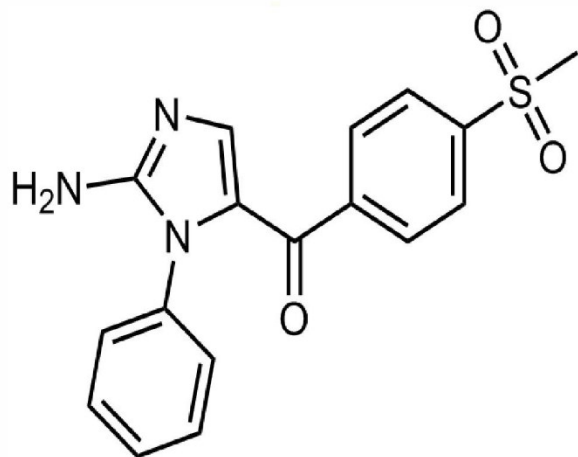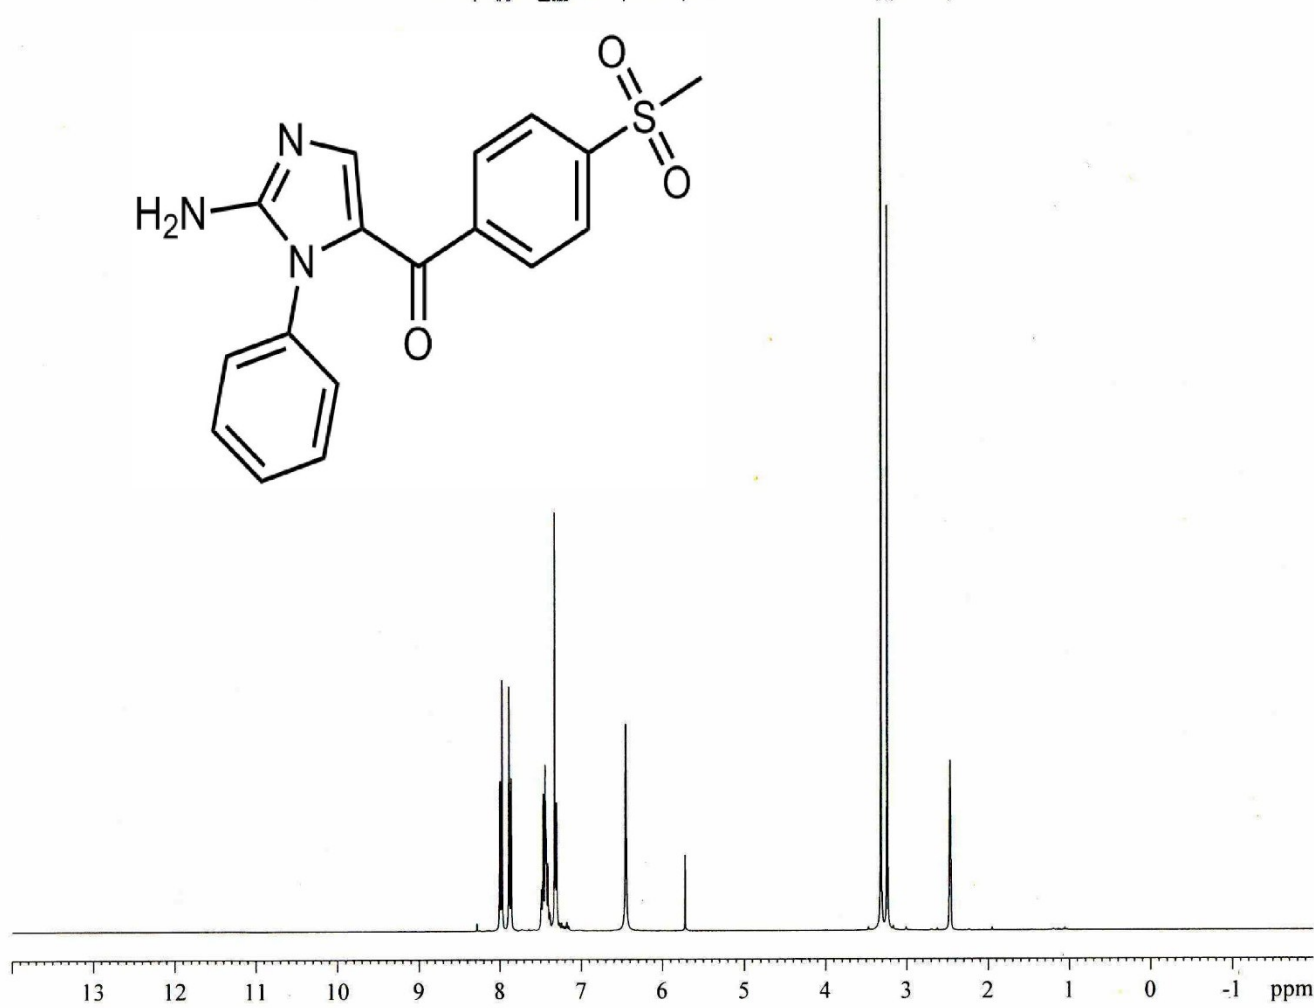

13 12 11 10 9 8 7 6 5 4 3 2 1 0 -1 ppm

0.033  
1.999  
2.028  
3.079  
3.001  
0.236  
2.022  
0.235  
3.019

13C-NMR / DMSO-d6

178.472

155.762  
144.025  
143.513  
142.616  
135.947  
129.219  
129.124  
128.097  
127.220  
127.024  
126.842

54.902  
43.356  
40.337  
40.059  
39.782  
39.503  
39.225  
38.947  
38.669

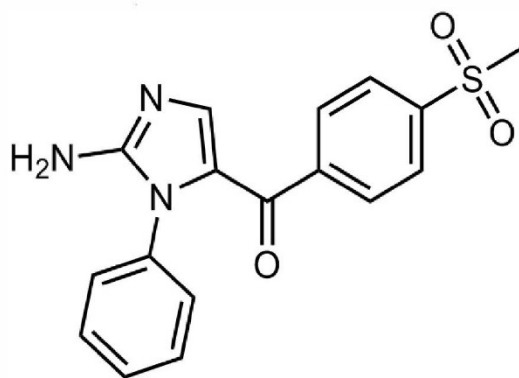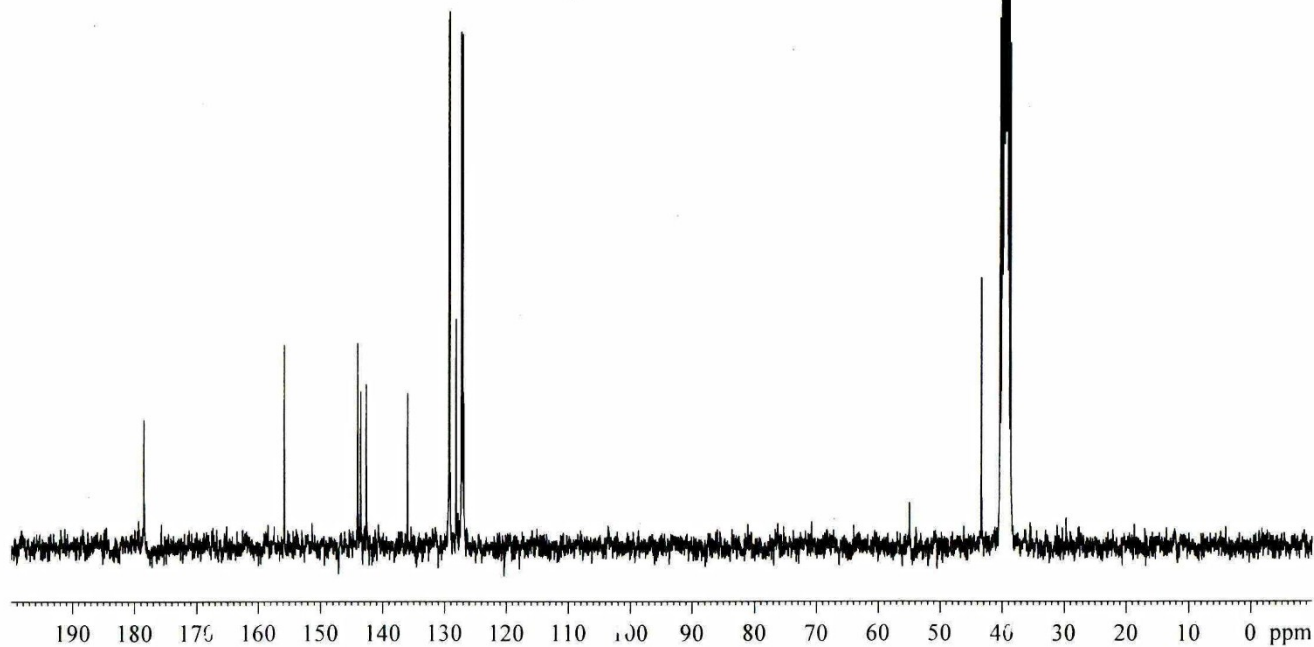



■ +Q1: 0.402 to 0.670 min from Sample 3 (APF I) of 030409.wiff (Ion Spray), subtracted (0.117 to 0.301 min)

Max. 6.8e4 cps

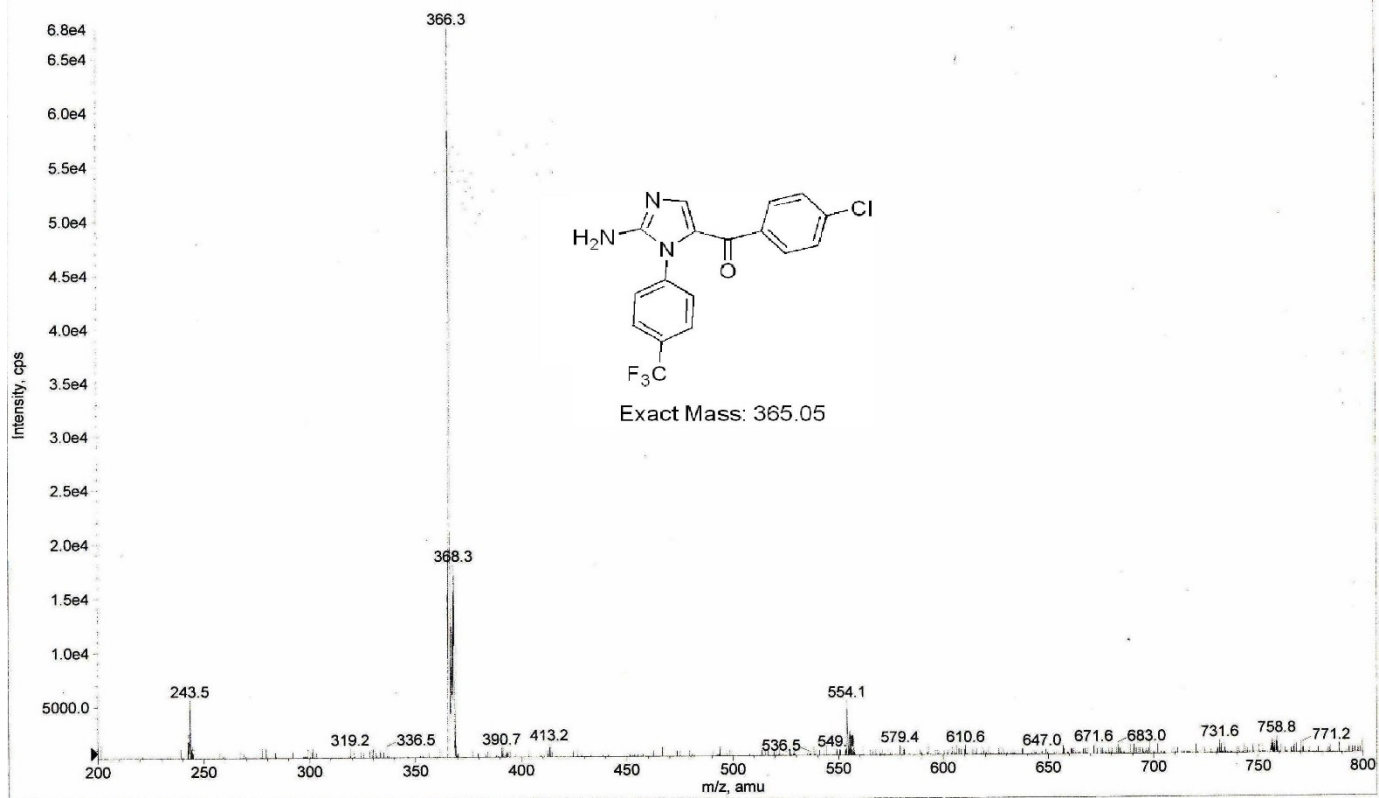

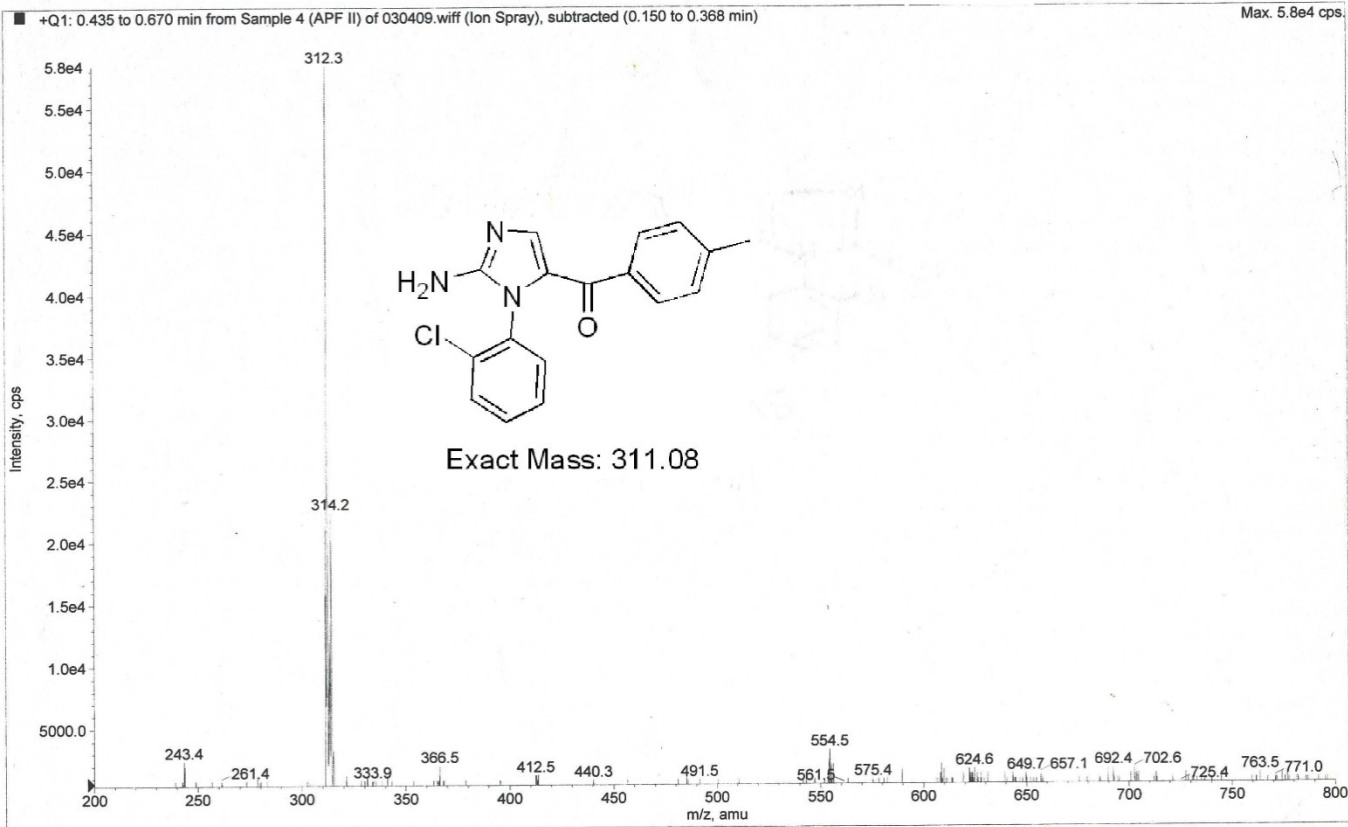

+Q1: 0.552 to 0.837 min from Sample 10 (B CL final) of 270409.wiff (Ion Spray), subtracted (0.184 to 0.452 min)

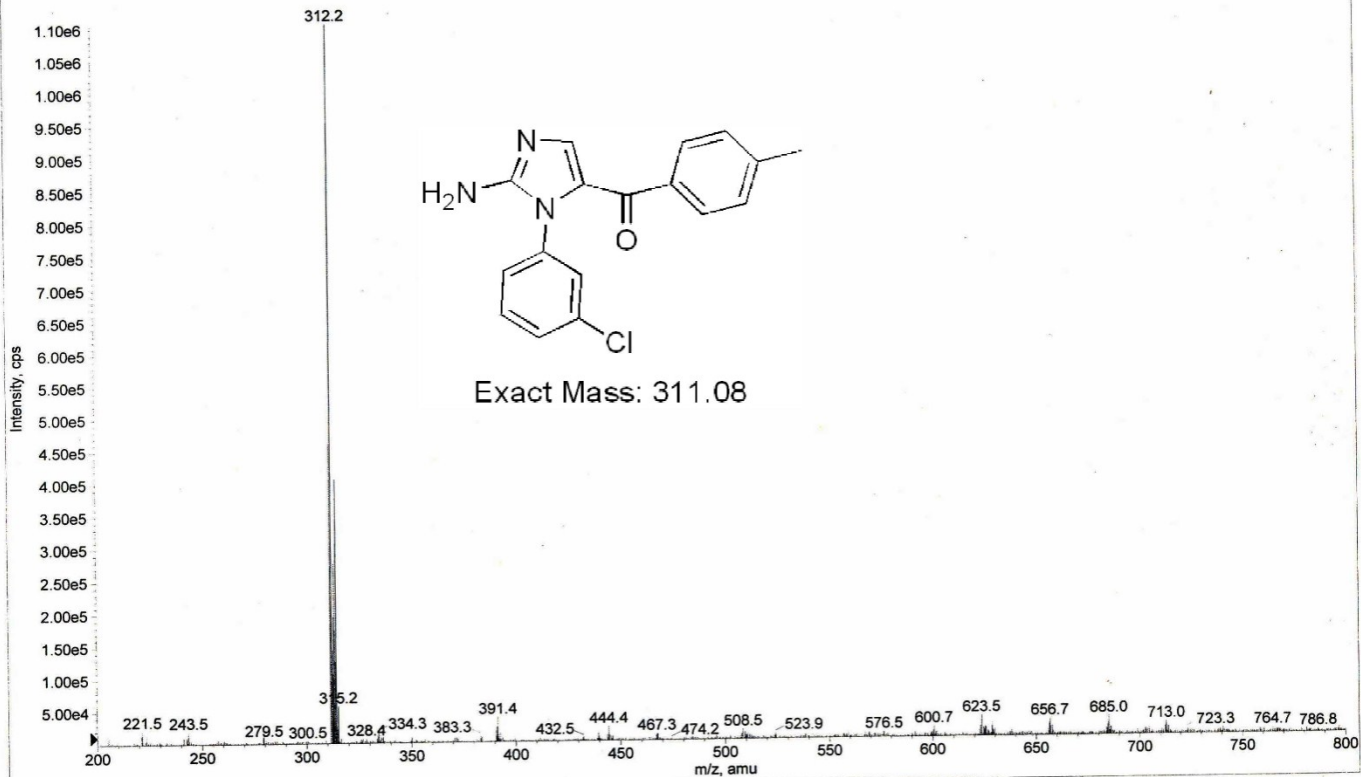

+Q1: 0.536 to 0.871 min from Sample 10 (AMIT) of 240409.wiff (Ion Spray), subtracted (0.201 to 0.452 min)

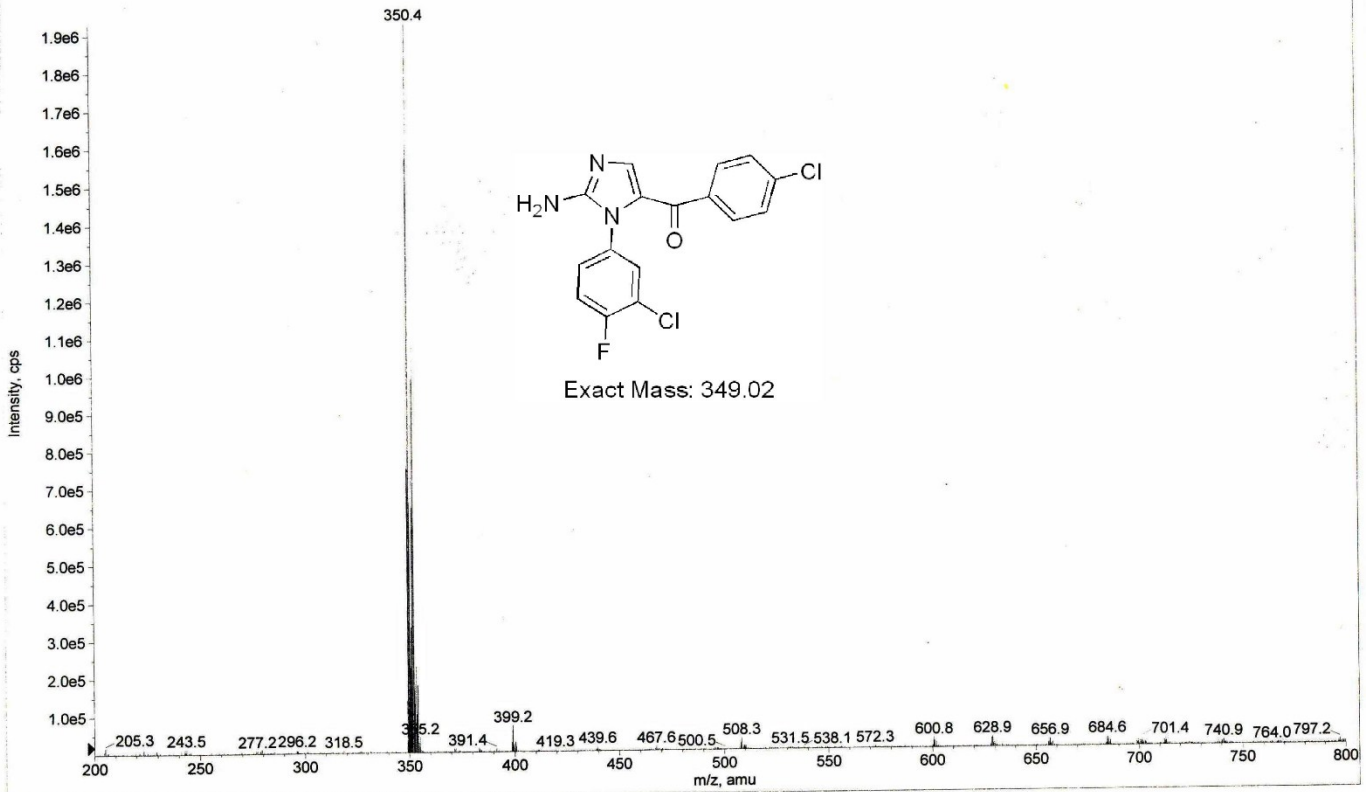

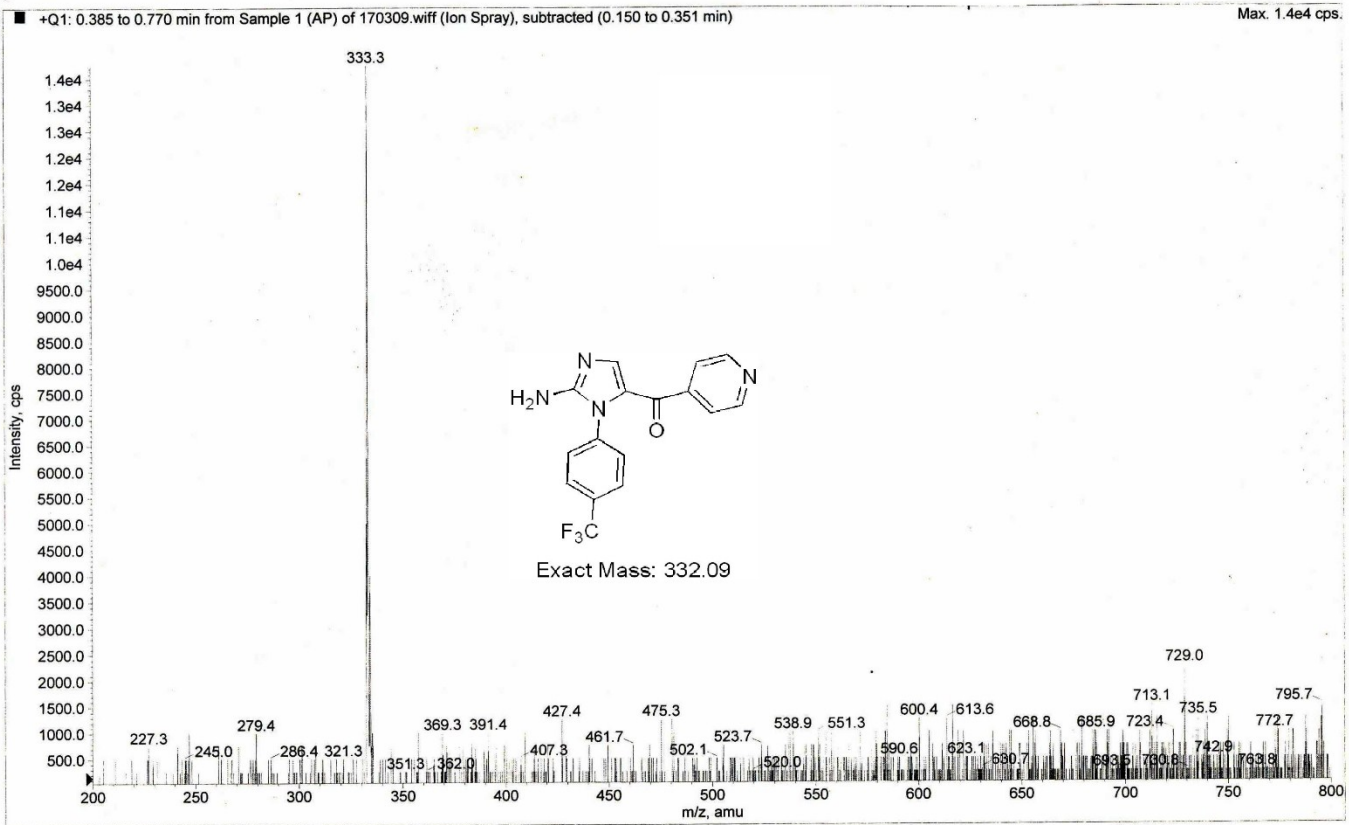

Printing Time: 05:26:19 PM

Role: Administrator

Analyst Version: 1.4

Workstation: ADMINISTRATOR

■ +Q1: 0.369 to 0.385 min from Sample 1 (PMC AP13) of PMC AP13.wiff (Turbo Spray)

Max. 4.9e6 cps

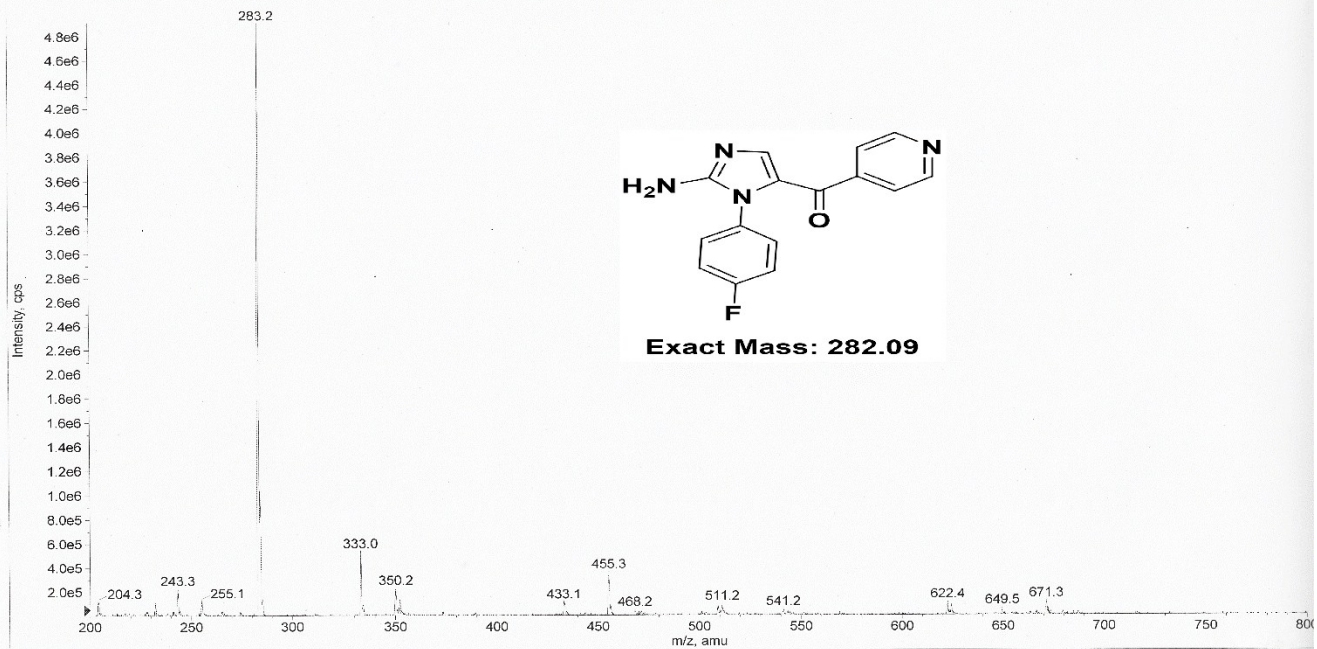

Method Name: N/A

Sample Number: N/A

Project: Example

Electronic Signature: no

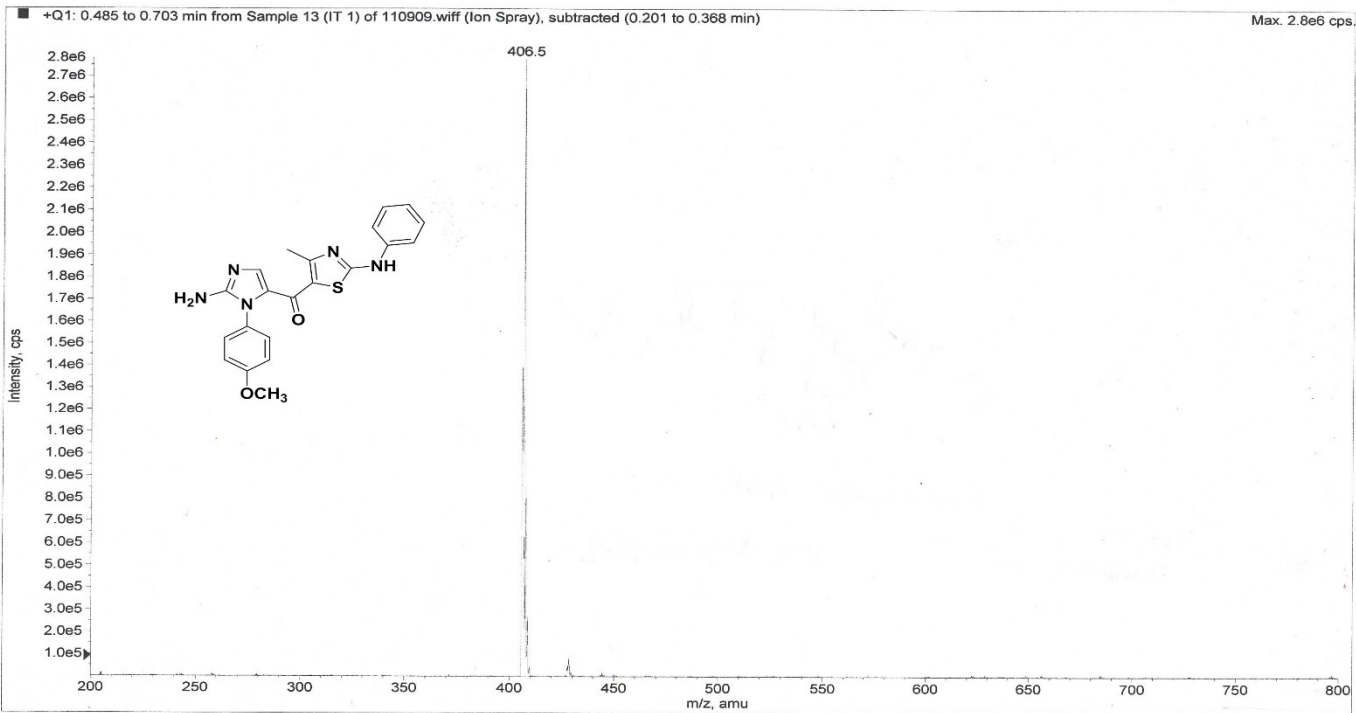

1H-NMR/IT-1 / DMSO-d6  
28.11.09

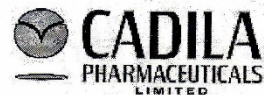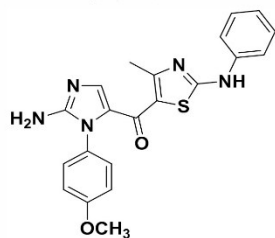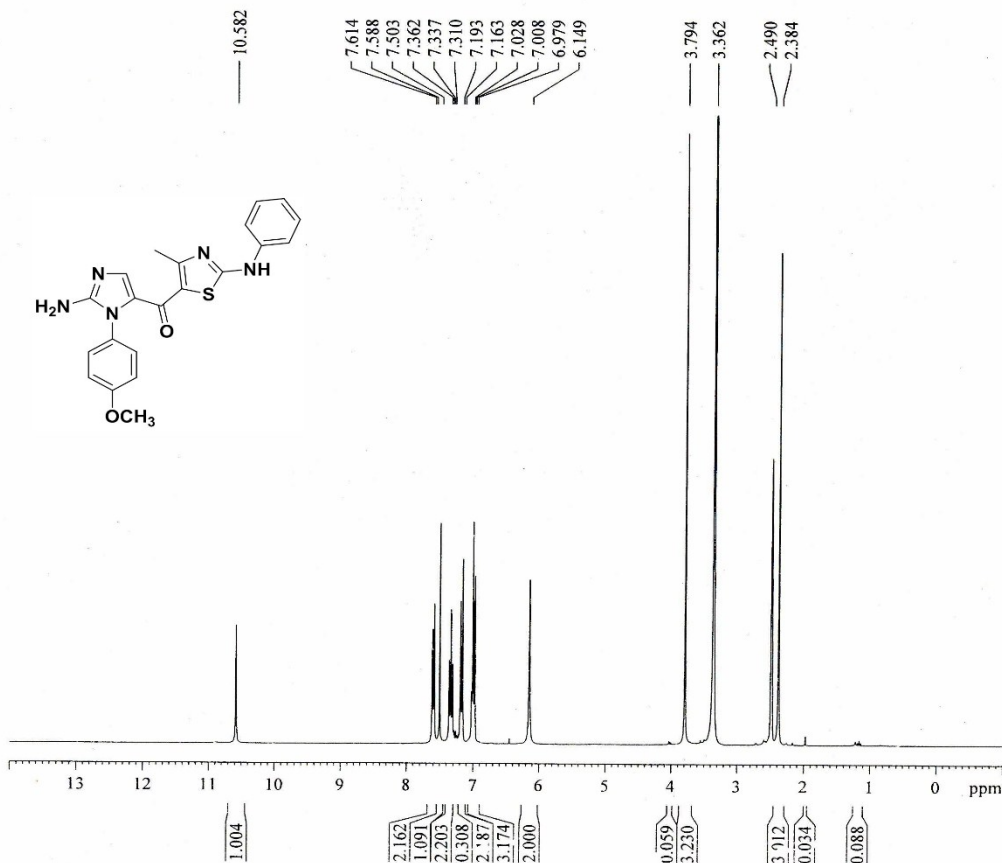

Current Data Parameters  
NAME PERD  
EXPNO 166  
PROCNO 1

F2 - Acquisition Parameters  
Date 20091128  
Time 15.28  
INSTRUM spect  
PROBHD 5 mm DUL 13C-1  
PULPROG zg30  
TD 32768  
SOLVENT DMSO  
NS 32  
DS 2  
SWH 6172.839 Hz  
FIDRES 0.188380 Hz  
AQ 2.6542580 sec  
RG 128  
DW 81.000 usec  
DE 6.00 usec  
TE 300.0 K  
D1 1.0000000 sec  
TD0 1

===== CHANNEL f1 =====  
NUC1 1H  
P1 13.00 usec  
PL1 0.00 dB  
SFO1 300.1318534 MHz

F2 - Processing parameters  
SI 32768  
SF 300.1300038 MHz  
WDW EM  
SSB 0  
LB 0.30 Hz  
GB 0  
PC 1.00

*Handwritten signature and date:*  
28/11/09



13C-NMR/ IT-1 / DMSO-d6  
28.11.09

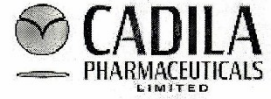

Current Data Parameters

NAME PERD  
EXPNO 167  
PROCNO 1

F2 - Acquisition Parameters

Date\_ 20091128  
Time 16.36  
INSTRUM spect  
PROBHD 5 mm DUL 13C-1  
PULPROG zgpg30  
TD 65536  
SOLVENT DMSO  
NS 1024  
DS 2  
SWH 17985.611 Hz  
FIDRES 0.274439 Hz  
AQ 1.8219508 sec  
RG 32768  
DW 27.800 usec  
DE 6.00 usec  
TE 300.0 K  
d11 0.03000000 sec  
D1 2.00000000 sec  
DELTA 1.89999998 sec  
TD0 1

===== CHANNEL f1 =====

NUC1 13C  
P1 9.00 usec  
PL1 -1.00 dB  
SFO1 75.4752953 MHz

===== CHANNEL f2 =====

CPDPRG2 waltz16  
NUC2 1H  
PCPD2 80.00 usec  
PL2 0.00 dB  
PL12 16.00 dB  
PL13 20.00 dB  
SFO2 300.1312005 MHz

F2 - Processing parameters

SI 32768  
SF 75.4677836 MHz  
WDW EM  
SSB 0  
LB 3.00 Hz  
GB 0  
F2 1.40

*Handwritten signature and date: 28/11/09*

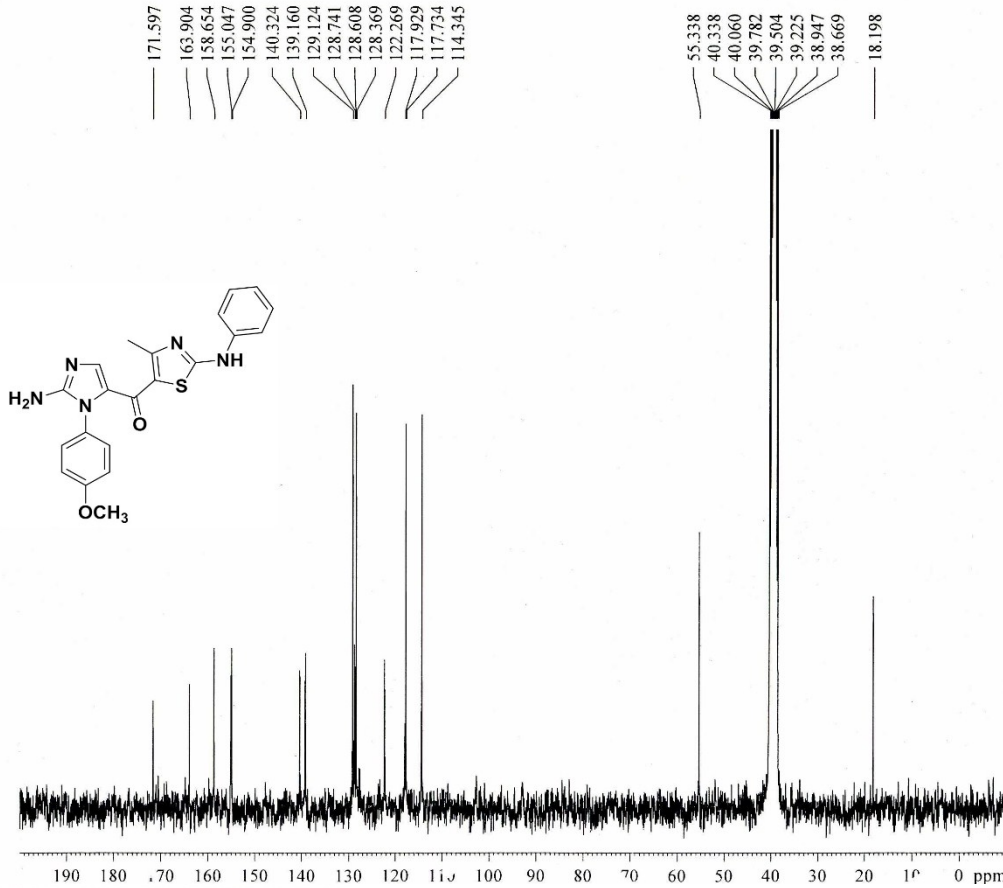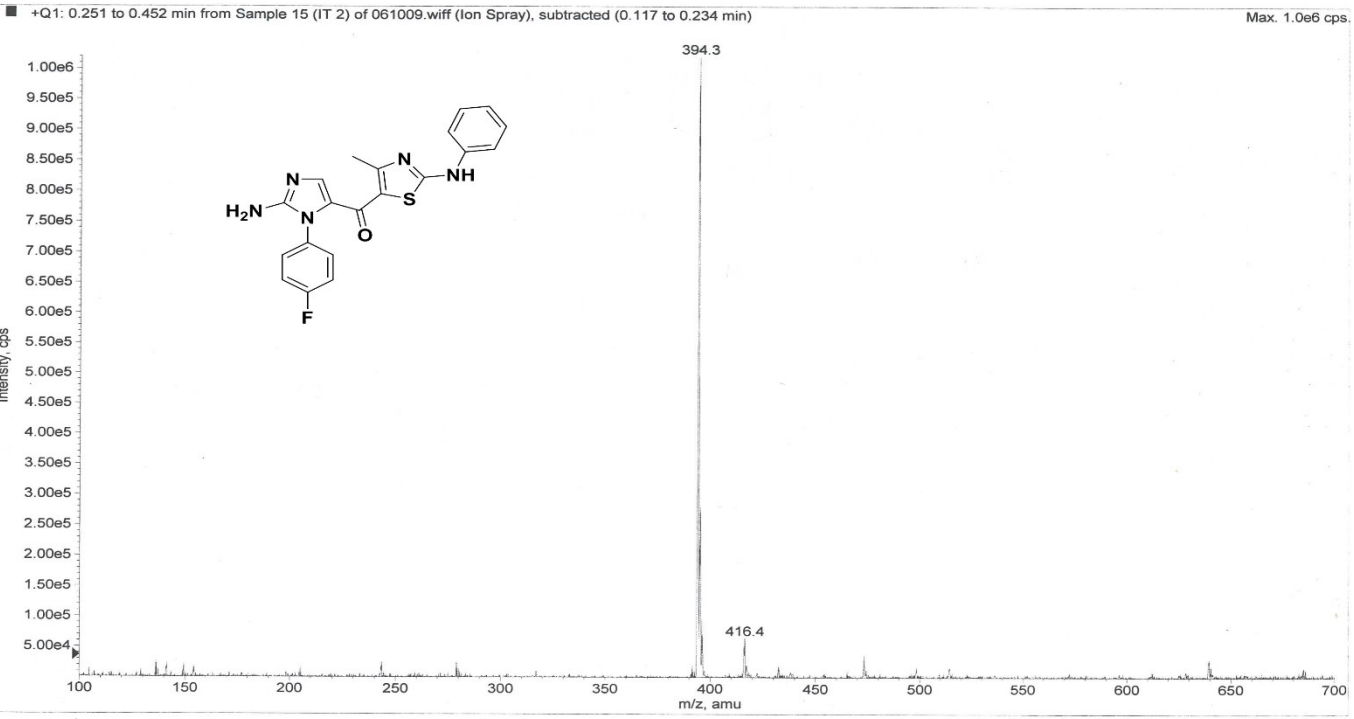



1H-NMR/ IT-2 / CDCl3  
30.11.09

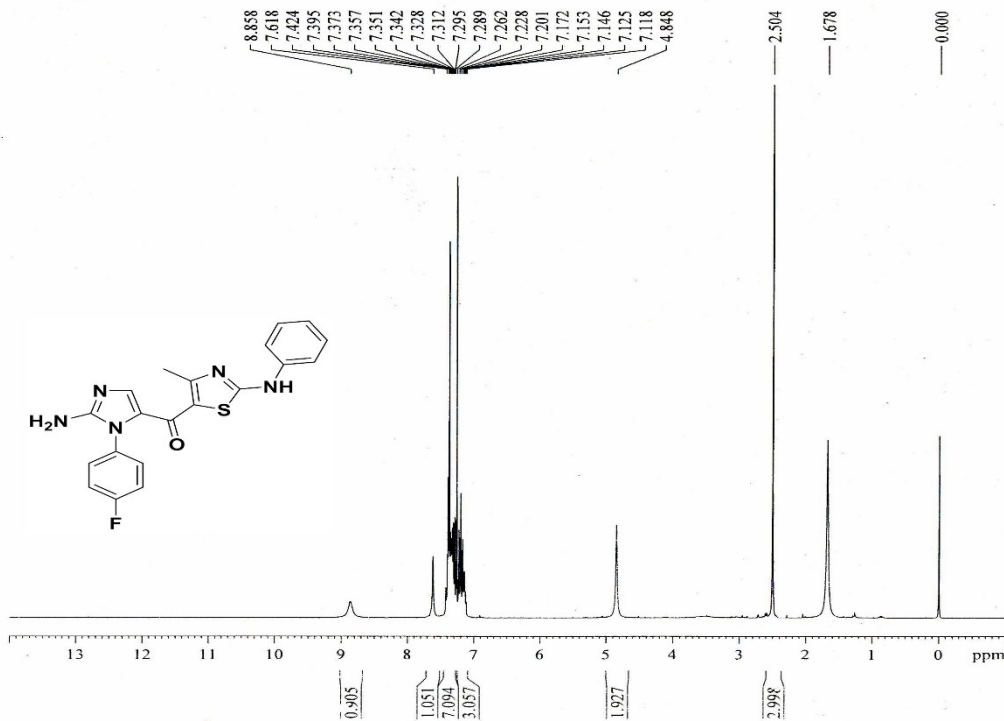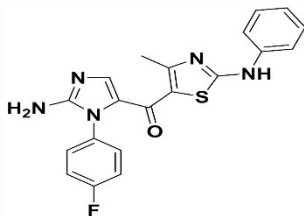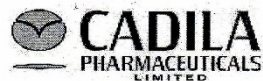

Current Data Parameters  
NAME PERD  
EXPNO 168  
PROCNO 1

F2 - Acquisition Parameters  
Date 20091130  
Time 9.47  
INSTRUM spect  
PROBHD 5 mm DUL 13C-1  
PULPROG zg30  
TD 32768  
SOLVENT CDCl3  
NS 32  
DS 2  
SWH 6172.839 Hz  
FIDRES 0.188380 Hz  
AQ 2.6542580 sec  
RG 406.4  
DW 81.000 usec  
DE 6.00 usec  
TE 300.0 K  
D1 1.00000000 sec  
TD0 1

CHANNEL f1  
NUC1 1H  
P1 13.00 usec  
PL1 0.00 dB  
SFO1 300.1318534 MHz

F2 - Processing parameters  
SI 32768  
SF 300.1300057 MHz  
WDW EM  
SSB 0  
LB 0.30 Hz  
GB 0  
PC 1.00

*WJ*  
*2011/107*

13C-NMR/ IT-2 / CDCl3  
30.11.09

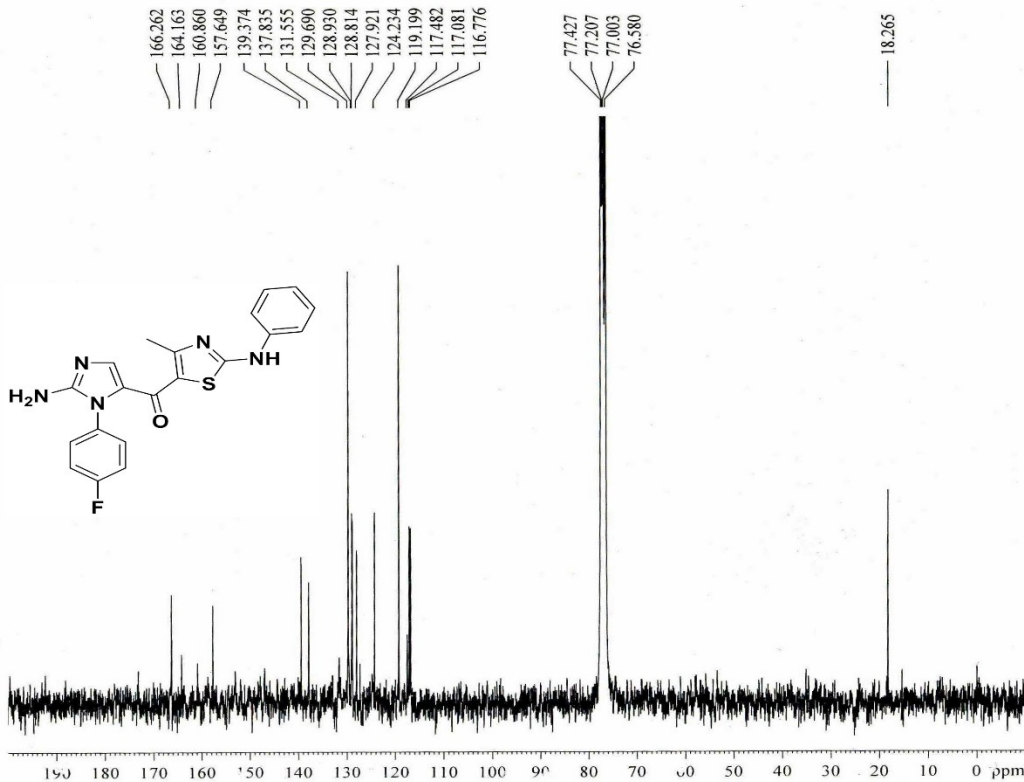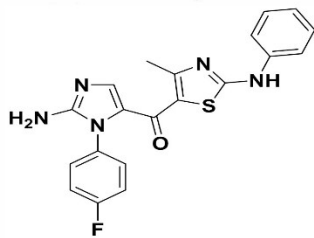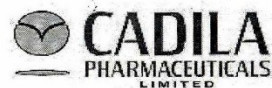

Current Data Parameters  
NAME PERD  
EXPNO 169  
PROCNO 1

F2 - Acquisition Parameters  
Date 20091130  
Time 12.02  
INSTRUM spect  
PROBHD 5 mm DUL 13C-1  
PULPROG zgpg30  
TD 65536  
SOLVENT CDCl3  
NS 4096  
DS 2  
SWH 17985.611 Hz  
FIDRES 0.274439 Hz  
AQ 1.8219508 sec  
RG 32768  
DW 27.800 usec  
DE 6.00 usec  
TE 300.0 K  
d11 0.03000000 sec  
D1 2.00000000 sec  
DELTA 1.89999998 sec  
TD0 1

CHANNEL f1  
NUC1 13C  
P1 9.00 usec  
PL1 -1.00 dB  
SFO1 75.4752953 MHz

CHANNEL f2  
CPDPRG2 waltz16  
NUC2 1H  
PCPD2 80.00 usec  
PL2 0.00 dB  
PL12 16.00 dB  
PL13 20.00 dB  
SFO2 300.1312005 MHz

F2 - Processing parameters  
SI 32768  
SF 75.4677498 MHz  
WDW EM  
SSB 0  
LB 3.00 Hz  
GB 0  
PC 1.40

*WJ*  
*2011/107*

Printing Time: 05:26:58 PM

Role: Administrator

Analyst Version: 1.4

Workstation: ADMINISTRATOR

+Q1: 0.318 to 0.335 min from Sample 1 (PMC APIT3) of PMC APIT3.wiff (Turbo Spray)

Max. 4.9e6 cps

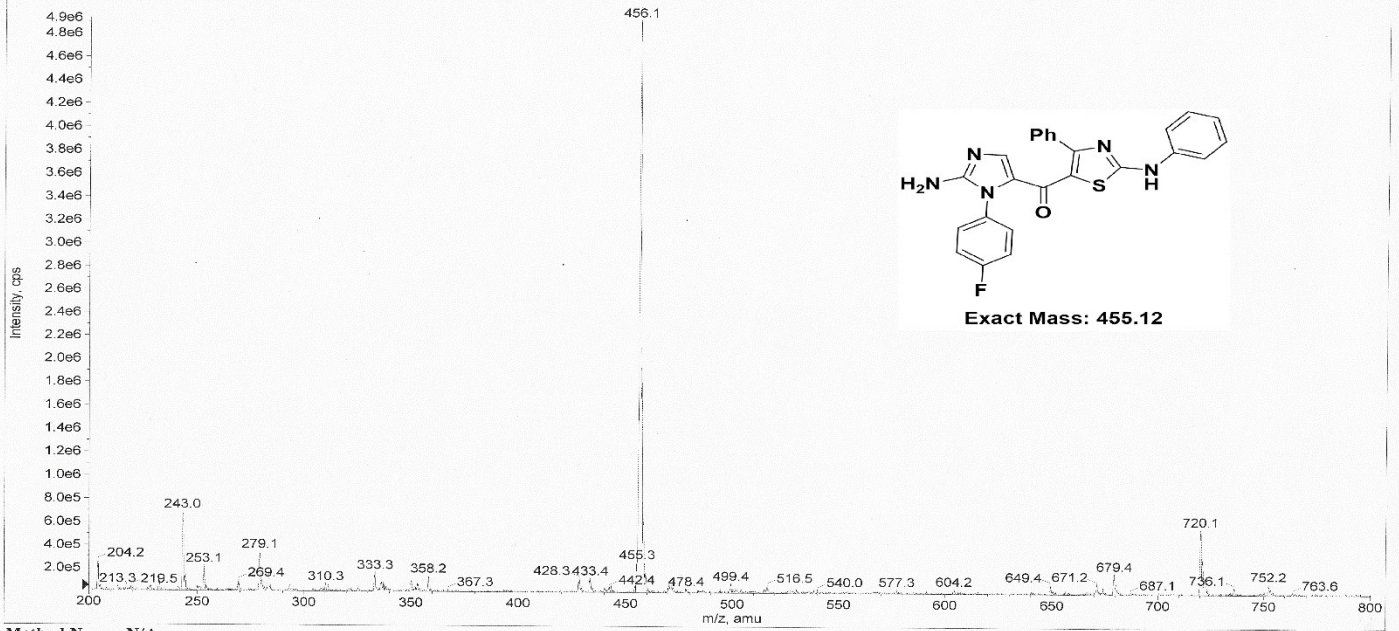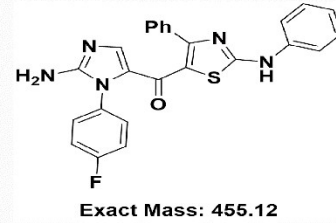

Method Name: N/A  
Project: Example

Sample Number: N/A  
Electronic Signature: no

1H-NMR/IT-3 / DMSO-d6  
30.11.09

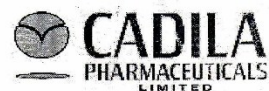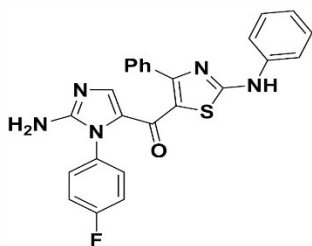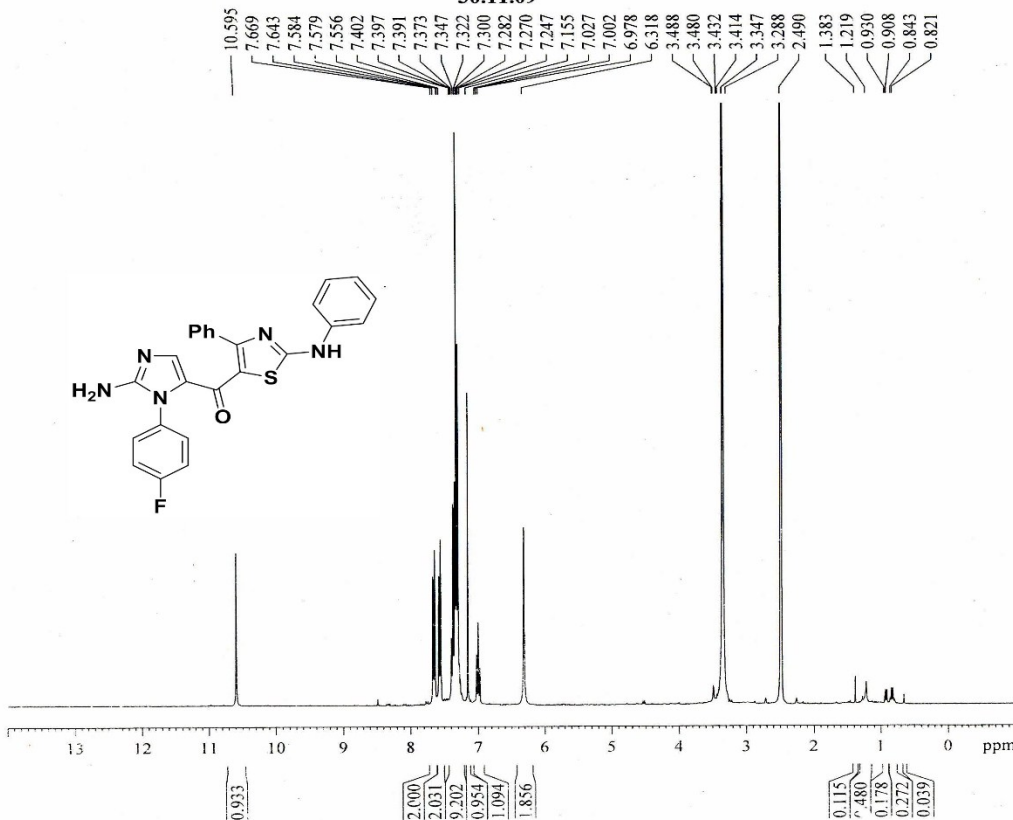

Current Data Parameters  
NAME PERD  
EXPNO 170  
PROCNO 1

F2 - Acquisition Parameters  
Date\_ 20091130  
Time\_ 15.18  
INSTRUM spect  
PROBHD 5 mm DUL 13C-1  
PULPROG zg30  
TD 32768  
SOLVENT DMSO  
NS 32  
DS 2  
SWH 6172.839 Hz  
FIDRES 0.188380 Hz  
AQ 2.6542580 sec  
RG 203.2  
DW 81.000 usec  
DE 6.00 usec  
TE 300.0 K  
D1 1.00000000 sec  
TD0 1

===== CHANNEL f1 =====  
NUC1 1H  
P1 13.00 usec  
PL1 0.00 dB  
SFO1 300.1318534 MHz

F2 - Processing parameters  
SI 32768  
SF 300.1300037 MHz  
WDW EM  
SSB 0  
LB 0.30 Hz  
GB 0  
PC 1.00

*Handwritten:* 30.11.09

13C-NMR/ IT-3 / DMSO-d6  
30.11.09

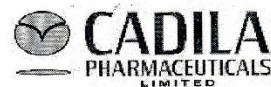

Current Data Parameters  
NAME PERD  
EXPNO 171  
PROCNO 1

F2 - Acquisition Parameters  
Date 20091130  
Time 17.33  
INSTRUM spect  
PROBHD 5 mm DUL 13C-1  
PULPROG zgpg30  
TD 65536  
SOLVENT DMSO  
NS 12288  
DS 2  
SWH 17985.611 Hz  
FIDRES 0.274439 Hz  
AQ 1.8219508 sec  
RG 32768  
DW 27.800 usec  
DE 6.00 usec  
TE 300.0 K  
d11 0.03000000 sec  
d1 2.00000000 sec  
DELTA 1.89999998 sec  
TD0 1

===== CHANNEL f1 =====  
NUC1 13C  
P1 9.00 usec  
PL1 -1.00 dB  
SFO1 75.4752953 MHz

===== CHANNEL f2 =====  
CPDPRG2 waltz16  
NUC2 1H  
PCPD2 80.00 usec  
PL2 0.00 dB  
PL12 16.00 dB  
PL13 20.00 dB  
SFO2 300.1312005 MHz

F2 - Processing parameters  
SI 32768  
SF 75.4677838 MHz  
WDW EM  
SSB 0  
LB 3.00 Hz  
GB 0  
PC 1.40

*Handwritten:* 40  
07/12/09

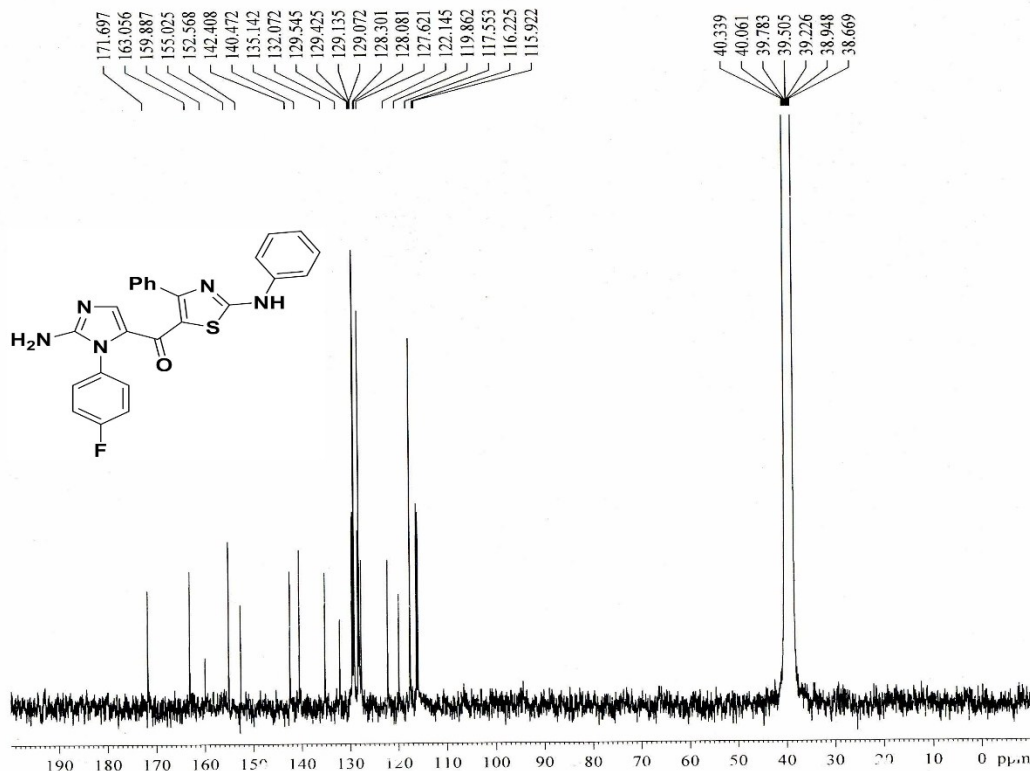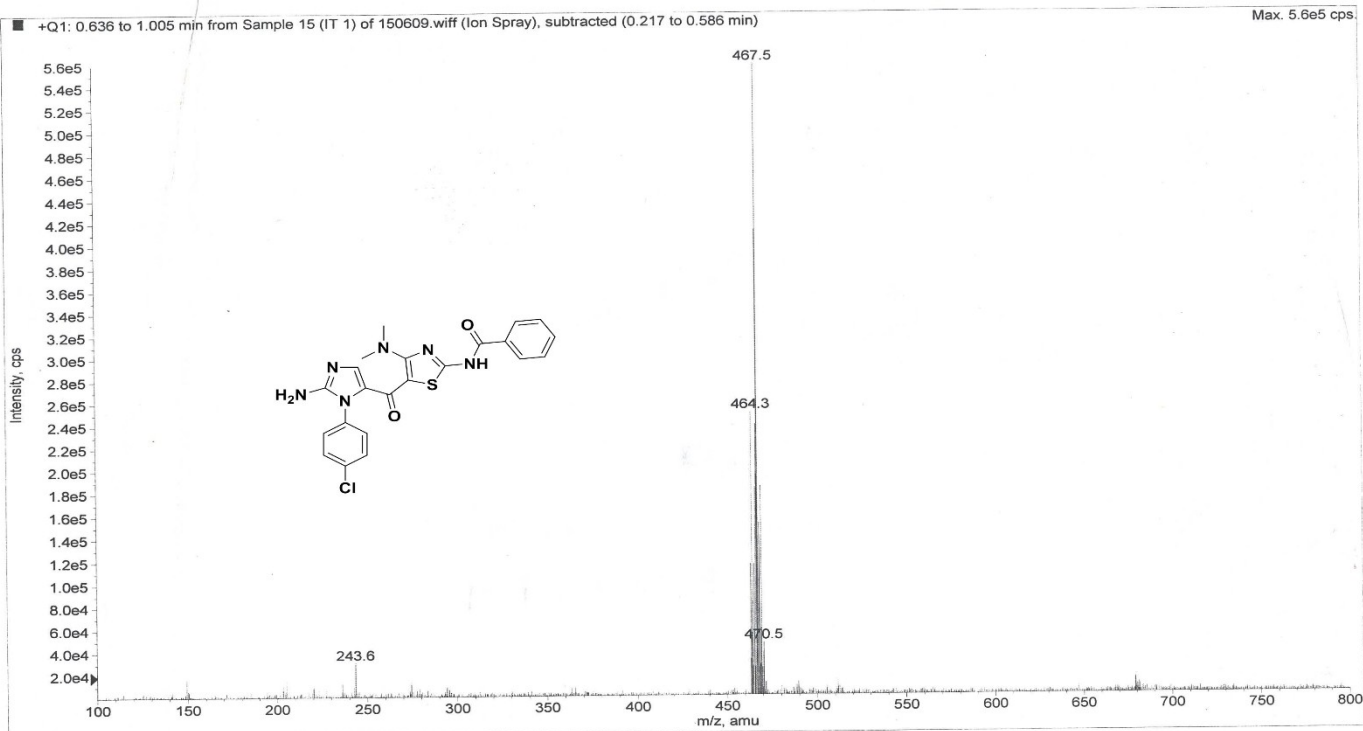



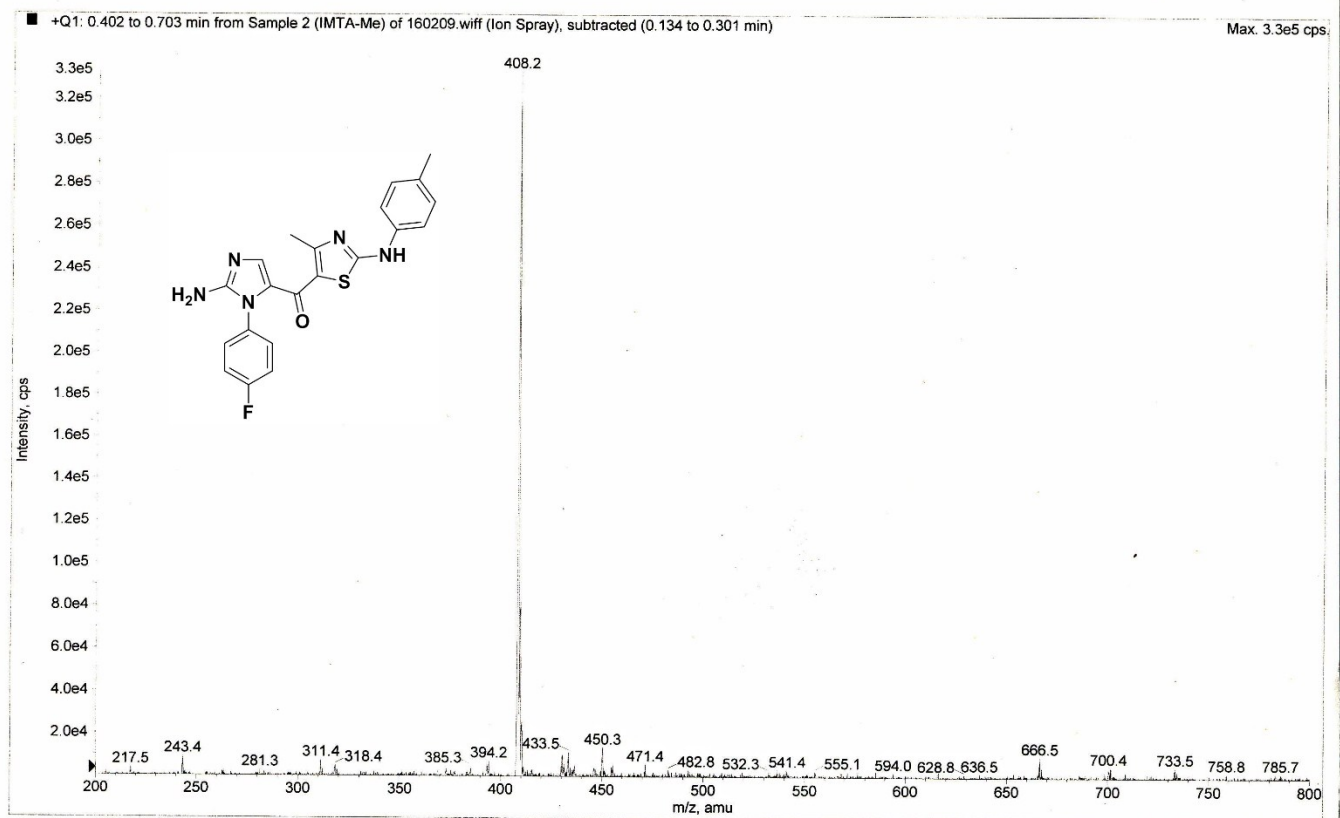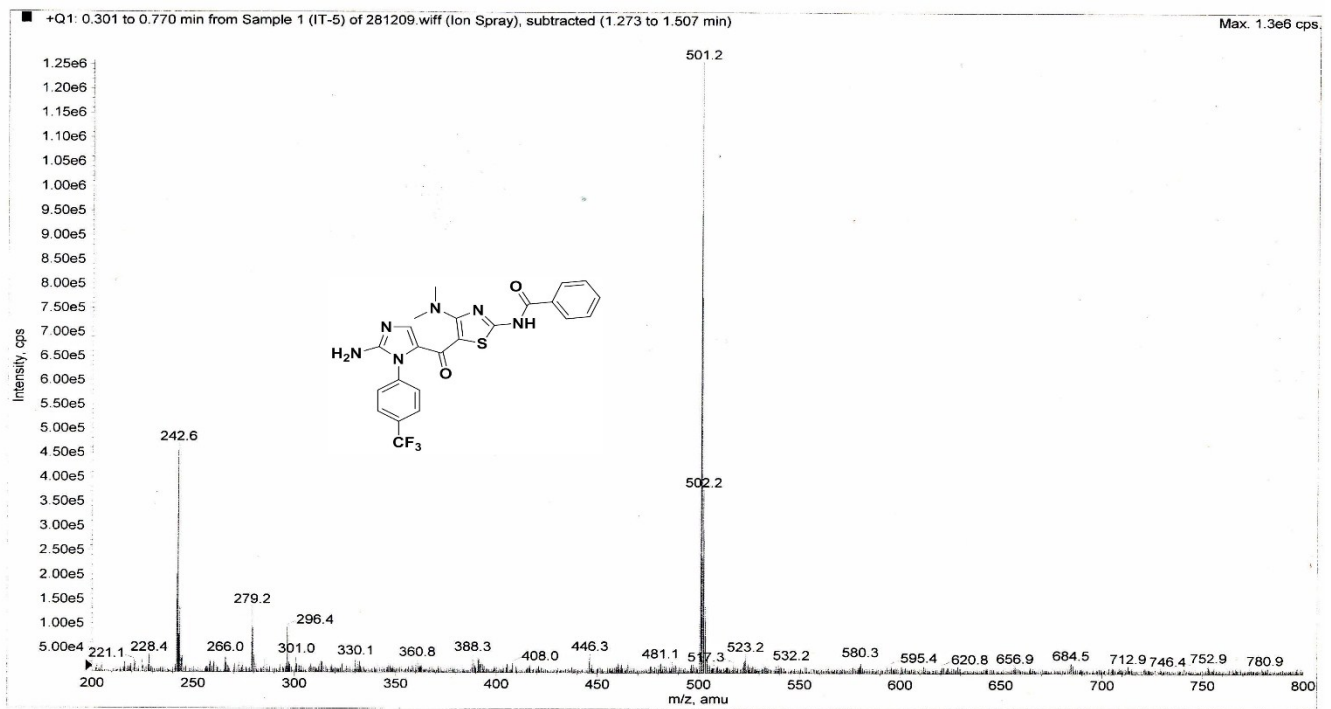

Printing Time: 05:28:41 PM

Role: Administrator

Analyst Version: 1.4

Workstation: ADMINISTRATOR

+Q1: 0.469 to 0.519 min from Sample 1 (PMC APIT7) of PMC APIT7.wiff (Turbo Spray)

Max. 1.3e7 cps

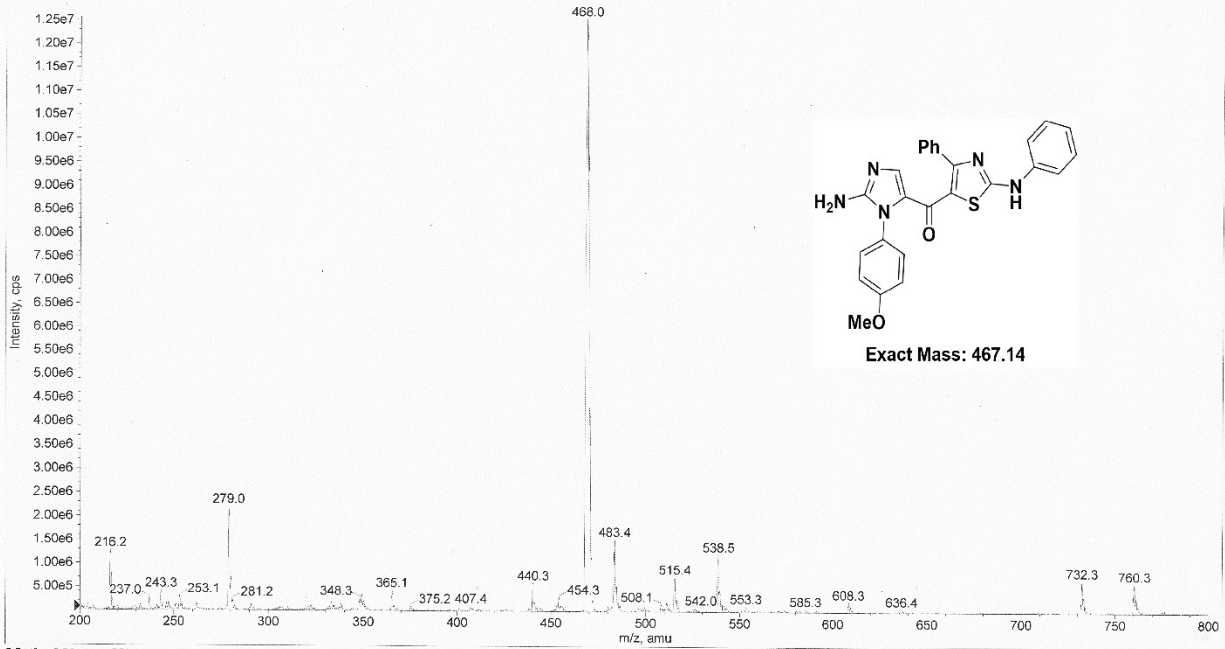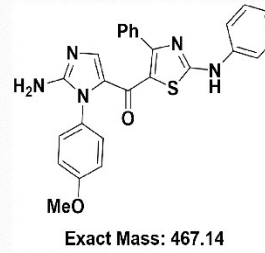

Method Name: N/A  
Project: Example

Sample Number: N/A  
Electronic Signature: no

Printing Time: 05:29:19 PM

Role: Administrator

Analyst Version: 1.4

Workstation: ADMINISTRATOR

■ +Q1: 0.318 min from Sample 1 (PMC APIT8) of PMC APIT8.wiff (Turbo Spray)

Max. 6.8e6 cps.

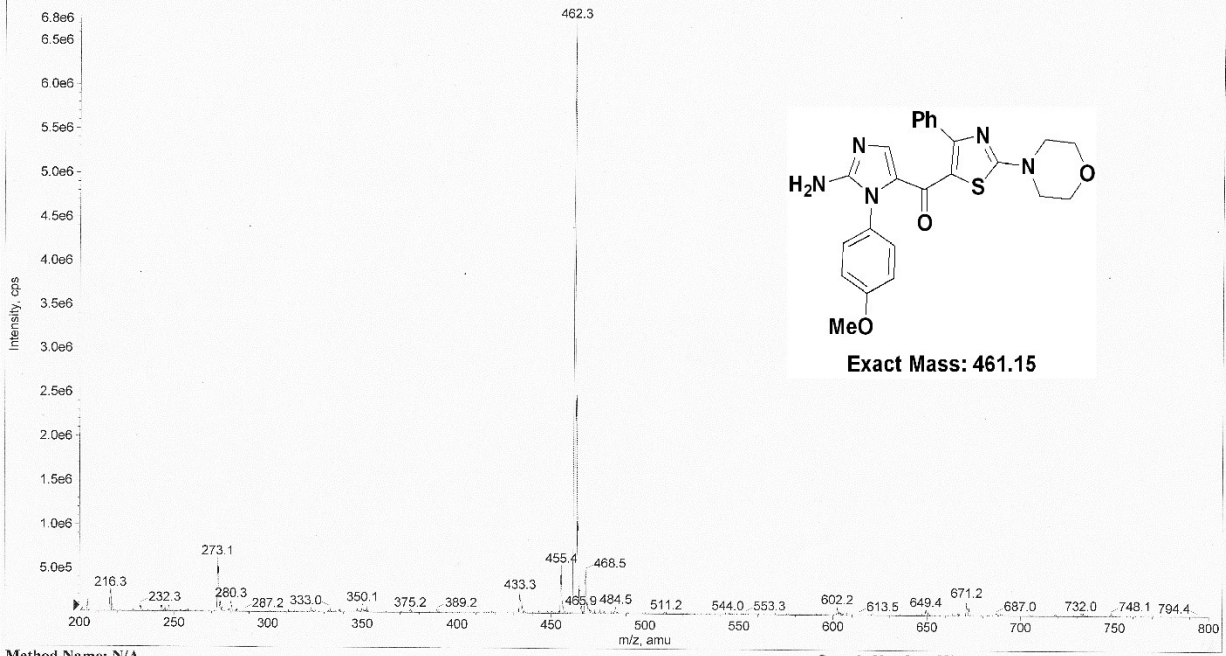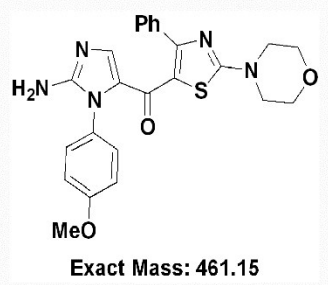

Method Name: N/A

Sample Number: N/A

Project: Example

Electronic Signature: no

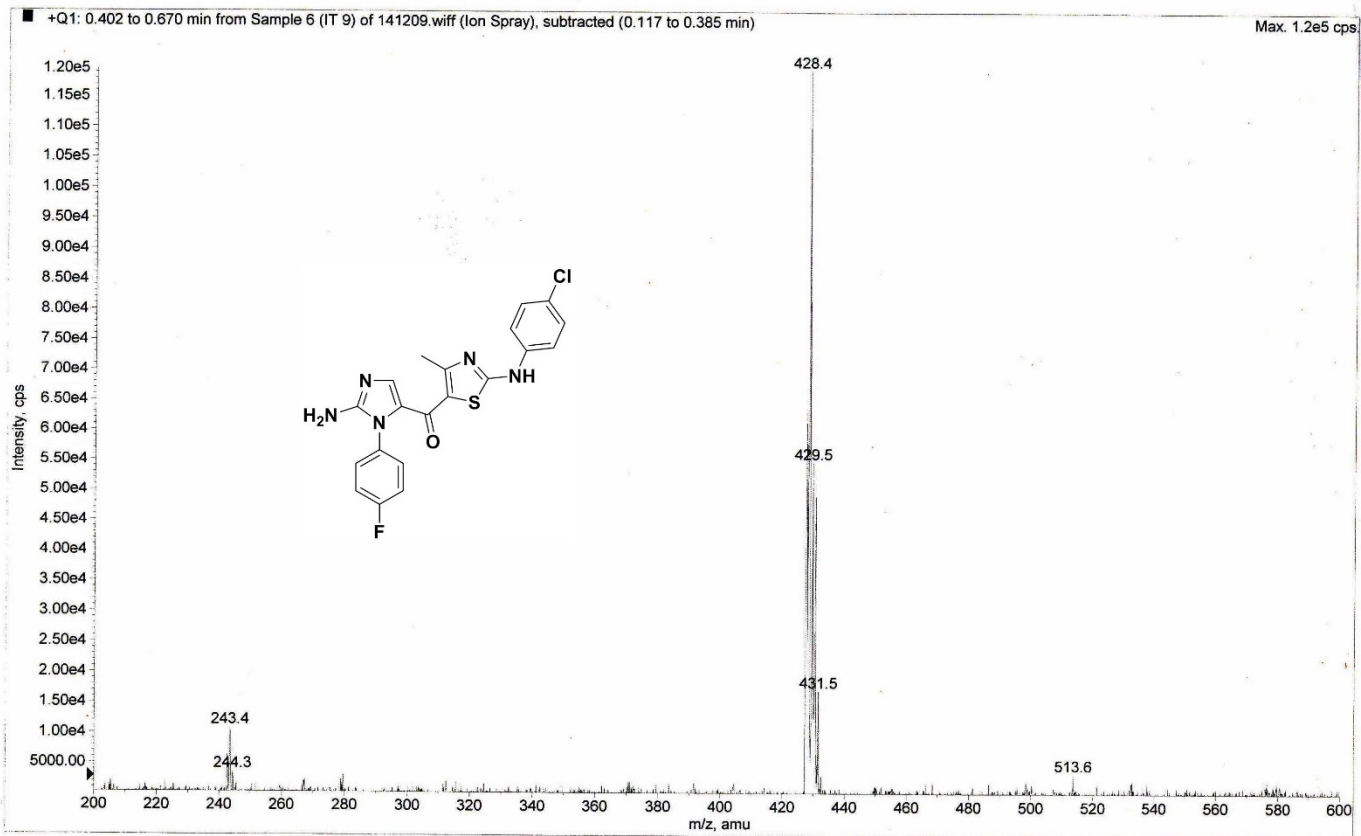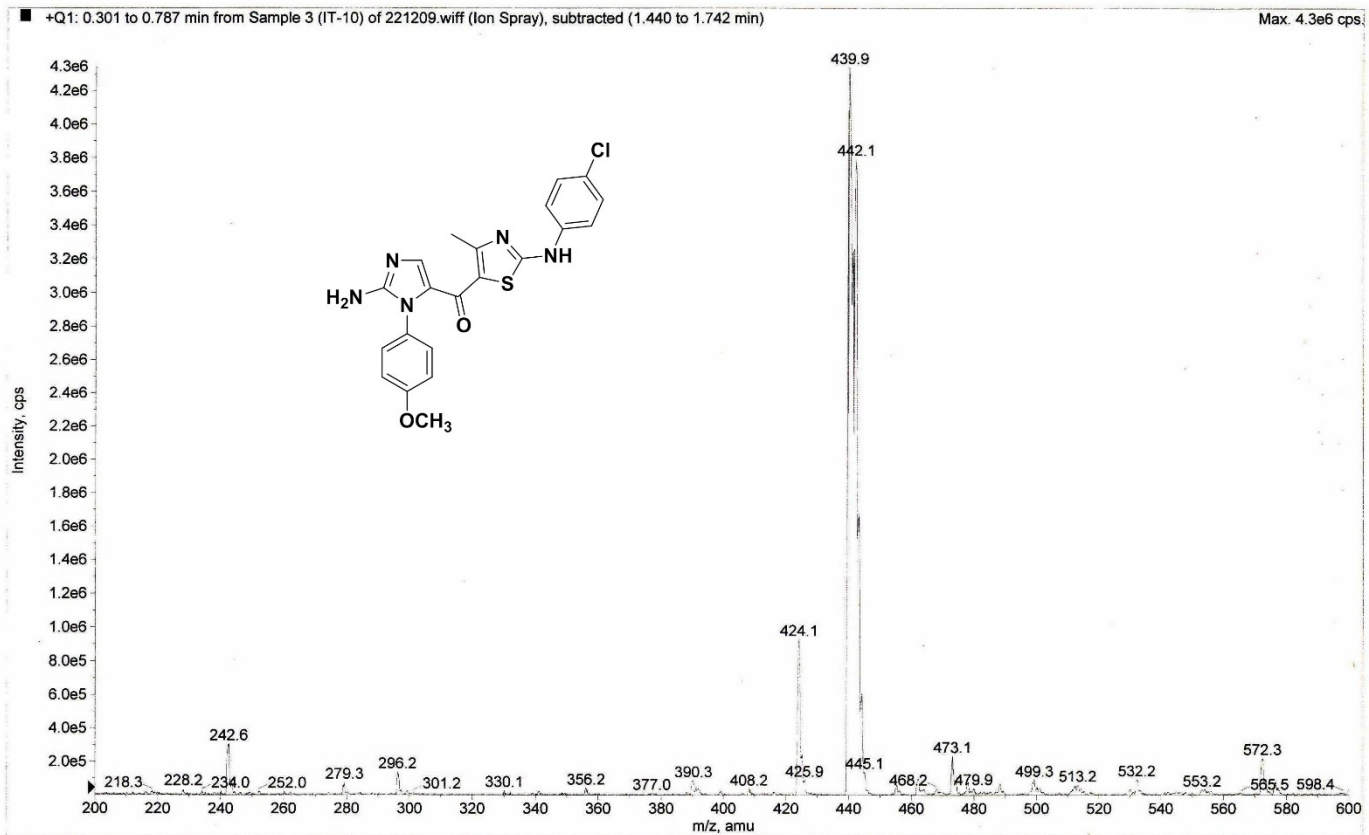



■ +Q1: 0.318 to 0.820 min from Sample 2 (IT-11) of 281209.wiff (Ion Spray), subtracted (1.642 to 1.976 min)

Max. 3.4e6 cps.

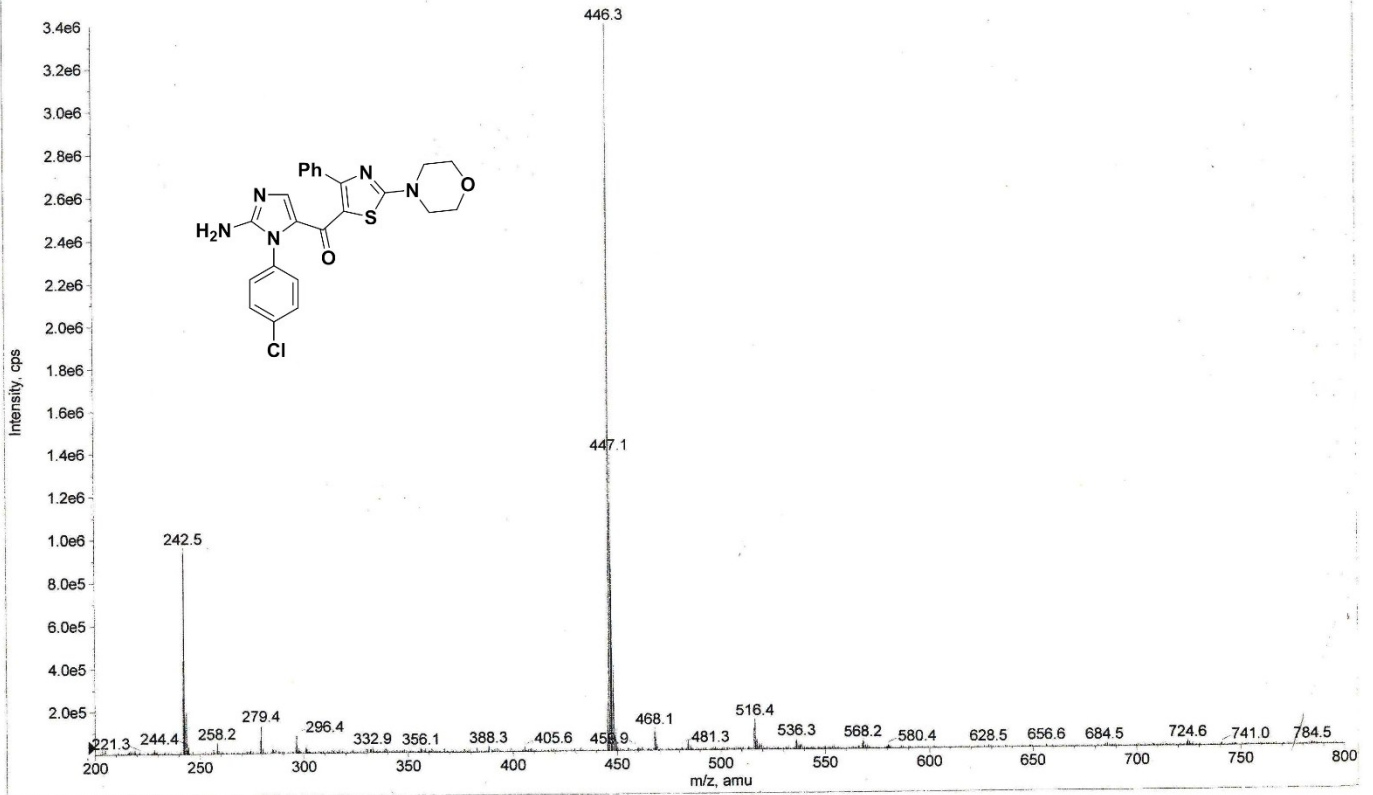

Supplement: MD-009-C7MD00643H-s001.pdf [file MD-009-C7MD00643H-s001.pdf]
